# Supplementary material for: Synthesis of polycyclic spiroindolines via the cascade reaction of 3-(2-isocyanoethyl)indoles
Source: Royal Society of Chemistry journal article supplement (doi:10.1039/d1cc04576h), 2021-01-01

## **Synthesis of Polycyclic Spiroindolines via the Cascade Reaction of 3-(2-isocyanoethyl)Indoles**

Haizhen Li, Jinyu Wu, Jianfeng Zheng\* and Wei-Dong Z. Li\*

## Contents

|                                                                                               |    |
|-----------------------------------------------------------------------------------------------|----|
| 1. General Information.....                                                                   | 3  |
| 2. Optimization of Reaction Conditions .....                                                  | 4  |
| 3. General Procedure and Spectral Data of Products <b>3</b> .....                             | 6  |
| 4. Experimental procedure for the scale-up reaction and transformations of the products ..... | 14 |
| 5. X-ray Structures of <b>3aa</b> and <b>4aa</b> .....                                        | 16 |
| 6. References.....                                                                            | 19 |
| 7. Copy of <sup>1</sup> H NMR and <sup>13</sup> C NMR Spectra .....                           | 20 |

## 1. General Information

Reactions were carried out using commercial reagents in over-dried apparatus.  $\text{CH}_2\text{Cl}_2$  was dried over powdered  $\text{CaH}_2$  and distilled under nitrogen just before use.  $^1\text{H}$  NMR spectra were recorded on commercial instruments (400 MHz). Chemical shifts are recorded in ppm relative to tetramethylsilane and with the solvent resonance as the internal standard ( $\text{CDCl}_3$ ,  $\delta = 7.26$ ). Spectra are reported as follows: chemical shift, multiplicity (s = singlet, d = doublet, t = triplet, m = multiplet), coupling constants (Hz), integration and assignment.  $^{13}\text{C}$  NMR data were collected on commercial instruments (101 MHz) with complete proton decoupling. Chemical shifts are reported in ppm from the tetramethylsilane with the solvent resonance as internal standard ( $\text{CDCl}_3$ ,  $\delta = 77.0$ ). Melting points (m. p.) were measured on the electrothermal digital melting point apparatus. HRMS was recorded on a commercial apparatus (ESI Source). All 2-isocyanoethylindoles<sup>1</sup> and 2,2-diester aziridines<sup>2</sup> were prepared according to the literature.

## 2. Optimization of Reaction Conditions

### 2.1 Screening of reaction solvents

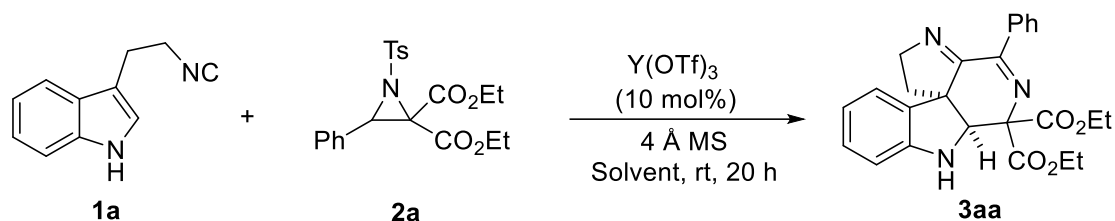

| Entry <sup>a</sup> | Solvent                              | Yield (%) <sup>b</sup> |
|--------------------|--------------------------------------|------------------------|
| 1                  | CH <sub>2</sub> Cl <sub>2</sub>      | 78%                    |
| 2                  | ClCH <sub>2</sub> CH <sub>2</sub> Cl | 73%                    |
| 3                  | CHCl <sub>3</sub>                    | 73%                    |
| 4                  | CH <sub>3</sub> CN                   | 22%                    |
| 5                  | 1,4-Dioxane                          | 13%                    |
| 6                  | THF                                  | trace                  |
| 7                  | Toluene                              | trace                  |
| 8                  | DMF                                  | N.R                    |

<sup>a</sup>Unless otherwise noted, the reactions were performed with Y(OTf)<sub>3</sub> (10 mol%), 4 Å MS (50 mg), **1a** (0.2 mmol) and **2a** (0.3 mmol) in solvent (1.0 mL) at rt for 20 h. <sup>b</sup>Yield of isolated product.

### 2.2 Screening of reaction temperature

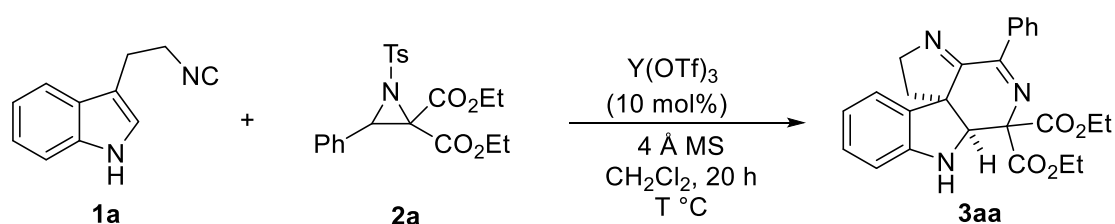

| Entry <sup>a</sup> | T     | yield (%) <sup>b</sup> |
|--------------------|-------|------------------------|
| 1                  | 0 °C  | 54%                    |
| 2                  | rt    | 78%                    |
| 3                  | 30 °C | 42%                    |

<sup>a</sup>Unless otherwise noted, the reactions were performed with Y(OTf)<sub>3</sub> (10 mol%), 4 Å MS (50 mg), **1a** (0.2 mmol) and **2a** (0.3 mmol) in CH<sub>2</sub>Cl<sub>2</sub> (1.0 mL) at rt for 20 h. <sup>b</sup>Yield of isolated product.

### 2.3 Screening of concentration of reaction

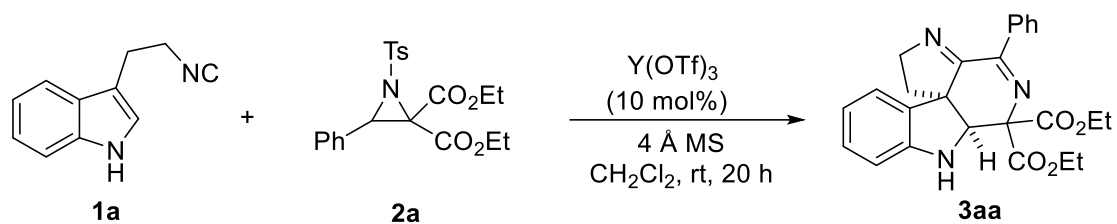

| Entry <sup>a</sup> | Concentration (mol/L) | Yield (%) <sup>b</sup> |
|--------------------|-----------------------|------------------------|
| 1                  | 0.40                  | 76%                    |
| 2                  | 0.20                  | 78%                    |
| 3                  | 0.13                  | 64%                    |

<sup>a</sup>Unless otherwise noted, the reactions were performed with Y(OTf)<sub>3</sub> (10 mol%), 4 Å MS (50 mg), **1a** (0.2 mmol) and **2a** (0.3 mmol) in CH<sub>2</sub>Cl<sub>2</sub> at rt for 20 h. <sup>b</sup>Yield of isolated product

### 3. General Procedure and Spectral Data of Products 3

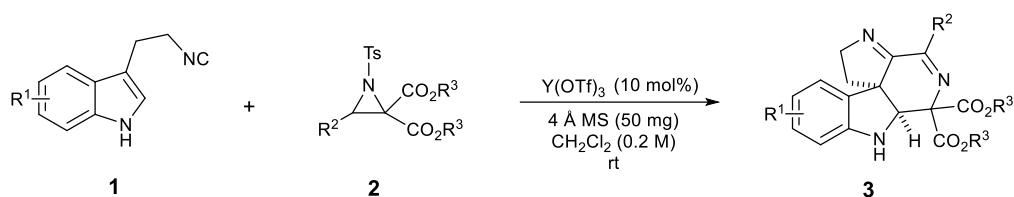

A dry reaction tube was charged with 2-isocyanoethylindoles **1** (0.2 mmol), aziridines **2** (0.3 mmol) and 4 ÅMS (50 mg). Under  $N_2$  atmosphere,  $CH_2Cl_2$  (0.5 mL) was added. The mixture was stirred at room temperature for 15 min, then  $Y(OTf)_3$  (0.02 mmol, 10.8 mg) and dry  $CH_2Cl_2$  (0.5 mL) was added in the tube. The reaction mixture continued stirring at room temperature for indicated time. The residue was directly purified by flash chromatography on silica gel using petroleum ether/ethyl acetate/dichloromethane = 5/1/1 as eluent to afford the desired products **3**.

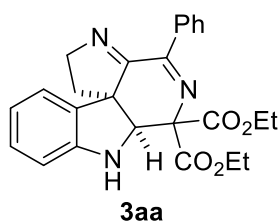

#### diethyl 4-phenyl-1,2,6a,7-tetrahydro-6H-pyrrolo[3',2':4,5]pyrido[3,4-b]indole-6,6-dicarboxylate **3aa**

The reaction was run at rt for 20 h, affording product **3aa** in 78% yield (67.4 mg) as a yellow solid.  $R_f = 0.3$  (PE:EA:DCM = 5:1:1), m.p. 123-125 °C.

$^1H$  NMR (400 MHz,  $CDCl_3$ )  $\delta$  7.91 – 7.82 (m, 2H), 7.36 – 7.21 (m, 3H), 6.95 – 6.85 (m, 2H), 6.57 (td,  $J = 7.5, 0.8$  Hz, 1H), 6.40 (d,  $J = 7.8$  Hz, 1H), 5.16 (d,  $J = 5.0$  Hz, 1H), 4.38 (qd,  $J = 7.1, 2.5$  Hz, 2H), 4.30 (td,  $J = 9.2, 4.5$  Hz, 1H), 4.22 – 4.15 (m, 2H), 4.13 – 4.02 (m, 2H), 2.67 – 2.49 (m, 2H), 1.33 (t,  $J = 7.2$  Hz, 3H), 1.12 (t,  $J = 7.2$  Hz, 3H).

$^{13}C$  NMR (101 MHz,  $CDCl_3$ )  $\delta$  169.0, 168.5, 167.9, 166.5, 149.1, 134.8, 131.4, 131.0, 129.1, 128.6, 128.2, 122.6, 119.6, 110.0, 76.0, 70.8, 62.7, 62.6, 62.4, 60.4, 41.3, 14.2, 13.9.

HRMS (ESI) calcd for  $C_{25}H_{26}N_3O_4$  ( $[M+H]^+$ ) = 432.1923, Found 432.1920.

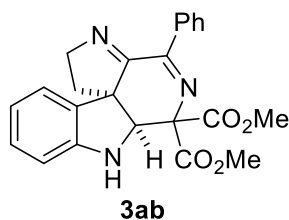

#### dimethyl 4-phenyl-1,2,6a,7-tetrahydro-6H-pyrrolo[3',2':4,5]pyrido[3,4-b]indole-6,6-dicarboxylate **3ab**

The reaction was run at rt for 24 h, affording product **3ab** in 49% yield (39.5 mg) as a yellow solid.  $R_f = 0.2$  (PE:EA:DCM = 5:1:1), m.p.

153-155 °C.  $^1H$  NMR (400 MHz,  $CDCl_3$ )  $\delta$  7.96 – 7.94 (m, 2H), 7.43 – 7.38 (m, 1H), 7.35 – 7.31 (m, 2H), 7.00 – 6.94 (m, 2H), 6.66 (td,  $J = 7.5, 0.8$  Hz, 1H), 6.49 (d,  $J = 7.8$  Hz, 1H), 5.27 (d,  $J = 5.3$  Hz, 1H), 4.43 – 4.35 (m, 1H), 4.30 – 4.24 (m, 2H), 4.00 (s, 3H), 3.68 (s, 3H), 2.73 – 2.57 (m, 2H).

$^{13}\text{C}$  NMR (101 MHz,  $\text{CDCl}_3$ )  $\delta$  169.8, 168.8, 167.8, 166.9, 149.0, 134.5, 131.6, 131.0, 129.1, 128.6, 128.3, 122.6, 119.8, 110.2, 76.1, 71.2, 62.7, 60.5, 53.6, 53.5, 41.3.

HRMS (ESI) calcd for  $\text{C}_{23}\text{H}_{22}\text{N}_3\text{O}_4$  ( $[\text{M}+\text{H}^+]$ ) = 404.1610, Found 404.1606.

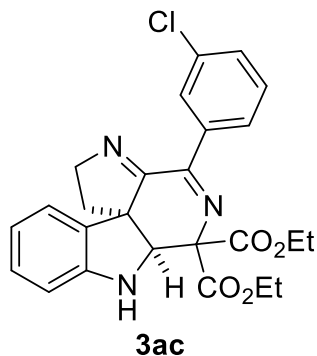

**diethyl 4-(3-chlorophenyl)-1,2,6a,7-tetrahydro-6H-pyrrolo[3',2':4,5]pyrido[3,4-b] indole-6,6-dicarboxylate 3ac**

The reaction was run at rt for 18 h, affording product **3ac** in 91% yield (84.6 mg) as a yellow solid.  $R_f$  = 0.2 (PE:EA:DCM = 5:1:1), m.p. 155-157 °C.

$^1\text{H}$  NMR (400 MHz,  $\text{CDCl}_3$ )  $\delta$  8.02 (t,  $J$  = 1.8 Hz, 1H), 7.82 (td,  $J$  = 8.0 Hz, 1.2 Hz, 1H), 7.38 – 7.36 (m, 1H), 7.28 – 7.24 (m, 1H), 6.99 – 6.95 (m, 2H), 6.65 (td,  $J$  = 7.5, 0.9 Hz, 1H), 6.50 – 6.48 (m, 1H), 5.23 (d,  $J$  = 4.0 Hz, 1H), 4.49 – 4.43 (m, 2H), 4.41 – 4.34 (m, 1H), 4.30 – 4.23 (m, 2H), 4.20 – 4.10 (m, 2H), 2.70 – 2.56 (m, 2H), 1.42 (t,  $J$  = 7.2 Hz, 3H), 1.20 (t,  $J$  = 7.2 Hz, 3H).

$^{13}\text{C}$  NMR (101 MHz,  $\text{CDCl}_3$ )  $\delta$  168.8, 167.5, 167.2, 166.2, 149.0, 136.3, 134.5, 131.5, 130.8, 129.5, 129.2, 128.2, 127.0, 122.6, 119.8, 110.1, 76.2, 70.8, 62.7, 62.7, 62.6, 60.5, 41.2, 14.2, 13.9.

HRMS (ESI) calcd for  $\text{C}_{25}\text{H}_{25}\text{ClN}_3\text{O}_4$  ( $[\text{M}+\text{H}^+]$ ) = 466.1534, Found 466.1512.

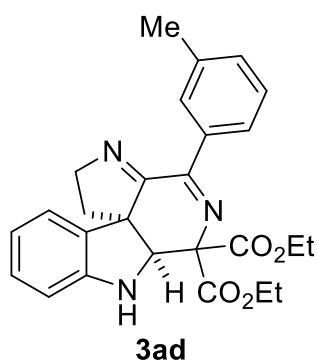

**diethyl 4-(m-tolyl)-1,2,6a,7-tetrahydro-6H-pyrrolo[3',2':4,5]pyrido[3,4-b] indole-6,6-dicarboxylate 3ad**

The reaction was run at rt for 24 h, affording product **3ad** in 92% yield (82.0 mg) as a yellow solid.  $R_f$  = 0.2 (PE:EA:DCM = 5:1:1), m.p. 158-160 °C.

$^1\text{H}$  NMR (400 MHz,  $\text{CDCl}_3$ )  $\delta$  7.82 (s, 1H), 7.69 (td,  $J$  = 4.0, 1.2 Hz, 1H), 7.21 – 7.19 (m, 2H), 6.99 – 6.93 (m, 2H), 6.64 (td,  $J$  = 7.2, 0.8 Hz, 1H), 6.47 (d,  $J$  = 8.0 Hz, 1H), 5.23 (d,  $J$  = 2.0 Hz, 1H), 4.46 (qd,  $J$  = 7.2, 2.8 Hz, 2H), 4.40 – 4.34 (m, 1H), 4.29 – 4.22 (m, 2H), 4.17 – 4.10 (m, 2H), 2.71 – 2.56 (m, 2H), 2.32 (s, 3H), 1.41 (t,  $J$  = 7.2 Hz, 3H), 1.19 (t,  $J$  = 7.2 Hz, 3H).

$^{13}\text{C}$  NMR (101 MHz,  $\text{CDCl}_3$ )  $\delta$  169.0, 168.7, 167.9, 166.5, 149.1, 137.9, 134.6, 132.4, 131.0, 129.1, 128.5, 128.1, 126.2, 122.6, 119.6, 110.1, 76.0, 70.9, 62.8, 62.6, 62.5, 60.4, 41.3, 21.3, 14.2, 13.9.

HRMS (ESI) calcd for C<sub>26</sub>H<sub>28</sub>N<sub>3</sub>O<sub>4</sub> ([M+H<sup>+</sup>]) = 446.2080, Found 446.2076.

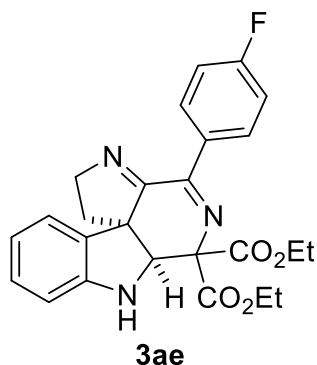

**diethyl 4-((4-fluorophenyl))-1,2,6a,7-tetrahydro-6H-pyrrolo[3',2':4,5]pyrido[3,4-b] indole-6,6-dicarboxylate 3ae**

The reaction was run at rt for 40 h, affording product **3ae** in 61% yield (54.5 mg) as a yellow solid. *R<sub>f</sub>* = 0.2 (PE:EA:DCM = 5:1:1), m.p. 149-151 °C.

<sup>1</sup>H NMR (400 MHz, CDCl<sub>3</sub>) δ 8.00 – 7.97 (m, 2H), 7.03 – 6.94 (m, 4H), 6.64 (td, *J* = 7.6, 1.2 Hz, 1H), 6.49 (dd, *J* = 8.0, 0.8 Hz, 1H), 5.22 (s, 1H),

4.49 – 4.42 (m, 2H), 4.40 – 4.34 (m, 1H), 4.30 – 4.22 (m, 2H), 4.20 – 4.10 (m, 2H), 2.71 – 2.56 (m, 2H), 1.41 (t, *J* = 7.2 Hz, 3H), 1.19 (t, *J* = 7.2 Hz, 3H).

<sup>13</sup>C NMR (101 MHz, CDCl<sub>3</sub>) δ 168.9, 167.8, 167.2, 166.2, 165.1 (d, *J* = 253 Hz), 149.0, 131.0 (d, *J* = 3 Hz), 130.9, 130.8, 129.2, 122.5, 119.7, 115.3 (d, *J* = 20 Hz), 110.1, 76.0, 70.7, 62.7, 62.7, 62.5, 60.4, 41.3, 14.2, 13.9.

HRMS (ESI) calcd for C<sub>25</sub>H<sub>25</sub>FN<sub>3</sub>O<sub>4</sub> ([M+H<sup>+</sup>]) = 450.1829, Found 450.1825.

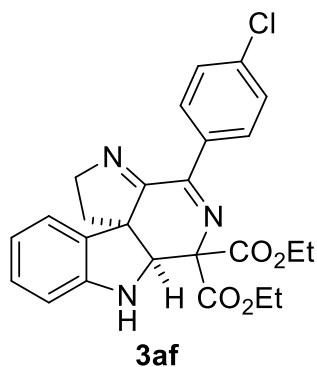

**diethyl 4-(4-chlorophenyl)-1,2,6a,7-tetrahydro-6H-pyrrolo[3',2':4,5]pyrido[3,4-b] indole-6,6-dicarboxylate 3af**

The reaction was run at rt for 33 h, affording product **3af** in 71% yield (66.0 mg) as a yellow solid. *R<sub>f</sub>* = 0.2 (PE:EA:DCM = 5:1:1), m.p. 107-109 °C.

<sup>1</sup>H NMR (400 MHz, CDCl<sub>3</sub>) δ 7.95 (d, *J* = 8.4 Hz, 2H), 7.31 (d, *J* = 8.0 Hz, 2H), 6.99 – 6.96 (m, 2H), 6.66 (t, *J* = 7.2 Hz, 1H), 6.50 (d, *J* = 8.0 Hz,

1H), 5.24 (s, 1H), 4.50 – 4.43 (m, 2H), 4.41 – 4.35 (m, 1H), 4.32 – 4.27 (m, 2H), 4.21 – 4.11 (m, 2H), 2.72 – 2.57 (m, 2H), 1.42 (t, *J* = 7.2 Hz, 3H), 1.21 (t, *J* = 7.2 Hz, 3H).

<sup>13</sup>C NMR (101 MHz, CDCl<sub>3</sub>) δ 168.8, 167.6, 167.3, 166.3, 149.0, 137.8, 133.1, 130.8, 129.9, 129.2, 128.5, 122.5, 119.7, 110.1, 76.1, 70.7, 62.7, 62.7, 62.5, 60.5, 41.2, 14.2, 13.9.

HRMS (ESI) calcd for C<sub>25</sub>H<sub>25</sub>ClN<sub>3</sub>O<sub>4</sub> ([M+H<sup>+</sup>]) = 466.1534, Found 466.1532.



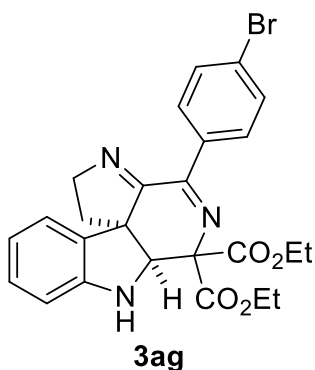

**diethyl 4-(4-bromophenyl)-1,2,6a,7-tetrahydro-6H-pyrrolo[3',2':4,5]pyrido[3,4-b] indole-6,6-dicarboxylate 3ag**

The reaction was run at rt for 33 h, affording product **3ag** in 77% yield (78.0 mg) as a yellow solid.  $R_f = 0.2$  (PE:EA:DCM = 5:1:1), m.p. 137-139 °C.

$^1\text{H NMR}$  (400 MHz,  $\text{CDCl}_3$ )  $\delta$  7.90 – 7.86 (m, 2H), 7.50 – 7.47 (m, 2H), 7.00 - 6.96 (m, 2H), 6.66 (td,  $J = 7.6, 1.2$  Hz, 1H), 6.50 (d,  $J = 7.6$  Hz,

1H), 5.24 (d,  $J = 3.6$  Hz, 1H), 4.52 – 4.44 (m, 2H), 4.42 – 4.36 (m, 1H), 4.32 – 4.24 (m, 2H), 4.22 – 4.12 (m, 2H), 2.70 – 2.60 (m, 2H), 1.43 (t,  $J = 7.2$  Hz, 3H), 1.21 (t,  $J = 7.2$  Hz, 3H).

$^{13}\text{C NMR}$  (101 MHz,  $\text{CDCl}_3$ )  $\delta$  168.8, 167.6, 167.4, 166.2, 149.0, 133.5, 131.5, 130.8, 130.1, 129.2, 126.5, 122.5, 119.7, 110.1, 76.1, 70.7, 62.7, 62.7, 62.5, 60.5, 41.2, 14.2, 13.9.

HRMS (ESI) calcd for  $\text{C}_{25}\text{H}_{25}\text{BrN}_3\text{O}_4$  ( $[\text{M}+\text{H}^+]$ ) = 510.1028, Found 510.1027.

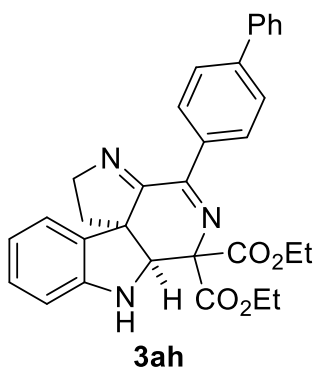

**diethyl 4-(4-[1,1'-biphenyl]-4-yl)-1,2,6a,7-tetrahydro-6H-pyrrolo[3',2':4,5]pyrido[3,4-b] indole-6,6-dicarboxylate 3ah**

The reaction was run at rt for 40 h, affording product **3ah** in 74% yield (75.4 mg) as a yellow solid.  $R_f = 0.2$  (PE:EA:DCM = 5:1:1), m.p. 148-150 °C.

$^1\text{H NMR}$  (400 MHz,  $\text{CDCl}_3$ )  $\delta$  8.05 – 8.02 (m, 2H), 7.57 – 7.55 (m, 4H), 7.44 – 7.40 (m, 2H), 7.36 – 7.32 (m, 1H), 7.01 – 6.94 (m, 2H), 6.66 (td,  $J$

= 7.6, 0.8 Hz, 1H), 6.49 (d,  $J = 8.0$  Hz, 1H), 5.25 (s, 1H), 4.51 – 4.42 (m, 2H), 4.40 – 4.36 (m, 1H), 4.32 – 4.23 (m, 2H), 4.18 – 4.11 (m, 2H), 2.73 – 2.58 (m, 2H), 1.42 (t,  $J = 7.2$  Hz, 3H), 1.21 (t,  $J = 7.2$  Hz, 3H).

$^{13}\text{C NMR}$  (101 MHz,  $\text{CDCl}_3$ )  $\delta$  169.0, 168.0, 167.9, 166.5, 149.1, 144.1, 140.5, 133.6, 131.0, 129.1, 129.1, 128.8, 127.7, 127.2, 127.0, 122.6, 119.7, 110.1, 76.1, 70.8, 62.7, 62.6, 62.5, 60.5, 41.3, 14.3, 13.9.

HRMS (ESI) calcd for  $\text{C}_{31}\text{H}_{30}\text{N}_3\text{O}_4$  ( $[\text{M}+\text{H}^+]$ ) = 508.2236, Found 508.2233.

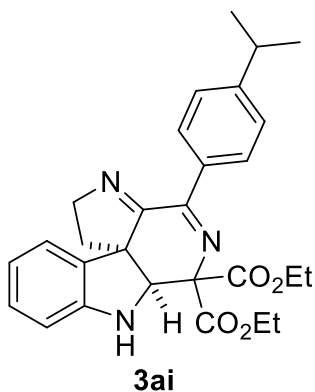

**diethyl 4-(4-isopropylphenyl)-1,2,6a,7-tetrahydro-6H-pyrrolo  
[3',2':4,5]pyrido[3,4-b] indole-6,6-dicarboxylate 3ai**

The reaction was run at rt for 40 h, affording product **3ai** in 83% yield (78.5 mg) as a yellow solid.  $R_f = 0.3$  (PE:EA:DCM = 5:1:1), m.p. 156-158 °C.

$^1\text{H}$  NMR (400 MHz,  $\text{CDCl}_3$ )  $\delta$  7.87 (d,  $J = 8.4$  Hz, 2H), 7.20 (d,  $J = 8.4$  Hz, 2H), 7.02 – 6.96 (m, 2H), 6.69 – 6.65 (m, 1H), 6.50 (d,  $J = 8.0$  Hz,

1H), 5.24 (d,  $J = 4.8$  Hz, 1H), 4.52 – 4.43 (m, 2H), 4.42 – 4.35 (m, 1H), 4.31 – 4.25 (m, 2H), 4.21 – 4.12 (m, 2H), 2.93 – 2.86 (m, 1H), 2.74 – 2.58 (m, 2H), 1.43 (t,  $J = 7.2$  Hz, 3H), 1.23 – 1.20 (m, 9H).

$^{13}\text{C}$  NMR (101 MHz,  $\text{CDCl}_3$ )  $\delta$  169.0, 168.3, 167.9, 166.6, 152.7, 149.1, 132.5, 131.1, 129.0, 128.7, 126.4, 122.6, 119.6, 110.0, 75.9, 70.7, 62.6, 62.5, 62.4, 60.3, 41.4, 34.1, 23.8, 23.6, 14.2, 13.9.

HRMS (ESI) calcd for  $\text{C}_{28}\text{H}_{32}\text{N}_3\text{O}_4$  ( $[\text{M}+\text{H}^+]$ ) = 474.2393, Found 474.2389.

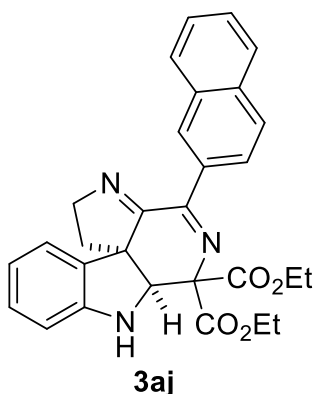

**diethyl 4-(4-(naphthalen-2-yl)-1,2,6a,7-tetrahydro-6H-pyrrolo  
[3',2':4,5]pyrido[3,4-b] indole-6,6-dicarboxylate 3aj**

The reaction was run at rt for 28 h, affording product **3aj** in 47% yield (45.3 mg) as a yellow solid.  $R_f = 0.2$  (PE:EA:DCM = 5:1:1), m.p. 155-157 °C.

$^1\text{H}$  NMR (400 MHz,  $\text{CDCl}_3$ )  $\delta$  8.30 (d,  $J = 8.4$  Hz, 1H), 7.83 (dd,  $J = 6.8$ , 2.4 Hz, 1H), 7.77 (d,  $J = 8.0$  Hz, 2H), 7.41 – 7.31 (m, 4H), 7.07 – 7.04

(m, 2H), 6.73 (td,  $J = 7.2$ , 0.8 Hz, 1H), 6.56 – 6.54 (m, 1H), 5.32 (s, 1H), 4.50 – 4.37 (m, 3H), 4.33 – 4.11 (m, 4H), 2.65 – 2.62 (m, 2H), 1.39 (t,  $J = 7.2$  Hz, 3H), 1.29 (t,  $J = 7.2$  Hz, 3H).

$^{13}\text{C}$  NMR (101 MHz,  $\text{CDCl}_3$ )  $\delta$  171.1, 169.4, 168.9, 166.5, 149.3, 133.9, 133.0, 131.1, 131.0, 130.8, 129.5, 129.1, 128.1, 126.8, 126.0, 125.9, 124.7, 123.1, 119.4, 109.9, 76.2, 70.1, 62.8, 62.5, 62.2, 60.2, 41.0, 14.2, 14.0.

HRMS (ESI) calcd for  $\text{C}_{29}\text{H}_{28}\text{N}_3\text{O}_4$  ( $[\text{M}+\text{H}^+]$ ) = 482.2080, Found 482.2076.

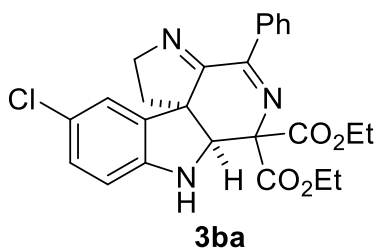

**diethyl 10-chloro-4-phenyl-1,2,6a,7-tetrahydro-6H-pyrrolo  
[3',2':4,5]pyrido[3,4-b] indole-6,6-dicarboxylate 3ba**

The reaction was run at rt for 28 h, affording product **3ba** in 65% yield (60.4 mg) as a yellow solid.  $R_f = 0.2$  (PE:EA:DCM = 5:1:1), m.p. 156-158 °C.

$^1\text{H NMR}$  (400 MHz,  $\text{CDCl}_3$ )  $\delta$  8.00 – 7.98 (dd,  $J = 8.4, 1.3$  Hz, 2H), 7.48 – 7.43 (m, 1H), 7.40 – 7.36 (m, 2H), 6.95 – 6.92 (m, 2H), 6.42 – 6.40 (m, 1H), 5.27 (s, 1H), 4.50 – 4.46 (m, 2H), 4.44 – 4.35 (m, 1H), 4.32 – 4.26 (m, 2H), 4.22 – 4.12 (m, 2H), 2.73 – 2.58 (m, 2H), 1.43 (t,  $J = 7.2$  Hz, 3H), 1.22 (t,  $J = 7.2$  Hz, 3H).

$^{13}\text{C NMR}$  (101 MHz,  $\text{CDCl}_3$ )  $\delta$  168.9, 168.3, 167.2, 166.3, 147.7, 134.5, 132.7, 131.6, 129.1, 128.5, 128.3, 123.8, 122.7, 110.7, 75.8, 71.2, 62.7, 62.6, 62.6, 60.4, 41.2, 14.2, 13.9.

HRMS (ESI) calcd for  $\text{C}_{25}\text{H}_{25}\text{ClN}_3\text{O}_4$  ( $[\text{M}+\text{H}^+]$ ) = 466.1534, Found 466.1531.

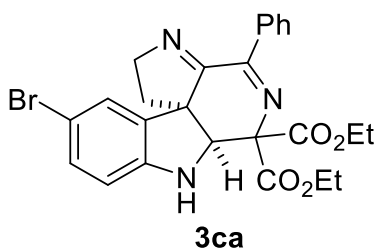

**diethyl 10-bromo-4-phenyl-1,2,6a,7-tetrahydro-6H-pyrrolo  
[3',2':4,5]pyrido[3,4-b] indole-6,6-dicarboxylate 3ca**

The reaction was run at rt for 31 h, affording product **3ca** in 85% yield (86.6 mg) as a yellow solid.  $R_f = 0.2$  (PE:EA:DCM = 5:1:1), m.p. 115-117°C.

$^1\text{H NMR}$  (400 MHz,  $\text{CDCl}_3$ )  $\delta$  7.98 – 7.95 (m, 2H), 7.45 – 7.41 (m, 1H), 7.38 – 7.34 (m, 2H), 7.04 – 7.02 (m, 2H), 6.34 (dd,  $J = 8.0, 1.2$  Hz, 1H), 5.24 (s, 1H), 4.47 – 4.41 (m, 2H), 4.39 – 4.23 (m, 3H), 4.19 – 4.09 (m, 2H), 2.69 – 2.54 (m, 2H), 1.40 (t,  $J = 7.2$  Hz, 3H), 1.19 (t,  $J = 7.2$  Hz, 3H).

$^{13}\text{C NMR}$  (101 MHz,  $\text{CDCl}_3$ )  $\delta$  168.9, 168.3, 167.2, 166.3, 148.2, 134.5, 133.2, 131.9, 131.7, 128.6, 128.4, 125.5, 111.2, 110.6, 75.8, 71.1, 62.7, 62.6, 62.5, 60.4, 41.2, 14.2, 13.9.

HRMS (ESI) calcd for  $\text{C}_{25}\text{H}_{25}\text{BrN}_3\text{O}_4$  ( $[\text{M}+\text{H}^+]$ ) = 510.1028, Found 510.1030.

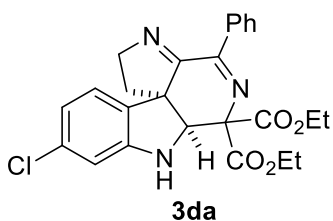

**diethyl 9-chloro-4-phenyl-1,2,6a,7-tetrahydro-6H-pyrrolo  
[3',2':4,5]pyrido[3,4-b] indole-6,6-dicarboxylate 3da**

The reaction was run at rt for 18 h, affording product **3da** in 82% yield (76 mg) as a yellow solid.  $R_f = 0.2$  (PE:EA:DCM = 5:1:1), m.p.

186-188 °C.

$^1\text{H}$  NMR (400 MHz,  $\text{CDCl}_3$ )  $\delta$  7.96 – 7.93 (m, 2H), 7.44 – 7.39 (m, 1H), 7.36 – 7.32 (m, 2H), 6.85 (d,  $J = 8.0$  Hz, 1H), 6.58 (dd,  $J = 8.0, 2.0$  Hz, 1H), 6.42 (d,  $J = 2.0$  Hz, 1H), 5.24 (d,  $J = 4.8$  Hz, 1H), 4.48 – 4.39 (m, 3H), 4.37 – 4.22 (m, 2H), 4.19 – 4.09 (m, 2H), 2.67 – 2.51 (m, 2H), 1.39 (t,  $J = 7.2$  Hz, 3H), 1.19 (t,  $J = 7.2$  Hz, 3H).

$^{13}\text{C}$  NMR (101 MHz,  $\text{CDCl}_3$ )  $\delta$  168.9, 168.4, 167.3, 166.3, 150.2, 134.8, 134.6, 131.6, 129.5, 128.5, 128.3, 123.3, 119.3, 109.9, 75.8, 71.1, 62.7, 62.6, 62.0, 60.4, 41.1, 14.2, 13.9.

HRMS (ESI) calcd for  $\text{C}_{25}\text{H}_{25}\text{ClN}_3\text{O}_4$  ( $[\text{M}+\text{H}^+]$ ) = 466.1534, Found 466.1531.

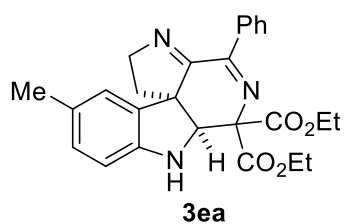

**diethyl 10-methyl-4-phenyl-1,2,6a,7-tetrahydro-6H-pyrrolo  
[3',2':4,5]pyrido[3,4-b] indole-6,6-dicarboxylate 3ea**

The reaction was run at rt for 24 h, affording product **3ea** in 56% yield (49.8 mg) as a yellow solid.  $R_f = 0.2$  (PE:EA:DCM = 5:1:1), m.p.

136-138 °C.

$^1\text{H}$  NMR (400 MHz,  $\text{CDCl}_3$ )  $\delta$  8.00 – 7.97 (m, 2H), 7.44 – 7.40 (m, 1H), 7.38 – 7.33 (m, 2H), 6.80 – 6.77 (m, 2H), 6.41 (d,  $J = 8.0$  Hz, 1H), 5.24 (s, 1H), 4.51 – 4.44 (m, 2H), 4.43 – 4.36 (m, 1H), 4.33 – 4.24 (m, 1H), 4.21 – 4.11 (m, 3H), 2.73 – 2.57 (m, 2H), 2.20 (s, 3H), 1.43 (t,  $J = 7.2$  Hz, 3H), 1.21 (t,  $J = 7.2$  Hz, 3H).

$^{13}\text{C}$  NMR (101 MHz,  $\text{CDCl}_3$ )  $\delta$  168.9, 168.3, 168.1, 166.5, 146.8, 134.8, 131.4, 129.6, 129.1, 128.6, 128.2, 123.1, 110.1, 76.1, 71.1, 62.8, 62.5, 62.4, 60.4, 41.3, 20.8, 14.2, 13.9.

HRMS (ESI) calcd for  $\text{C}_{26}\text{H}_{28}\text{N}_3\text{O}_4$  ( $[\text{M}+\text{H}^+]$ ) = 446.2080, Found 446.2076.

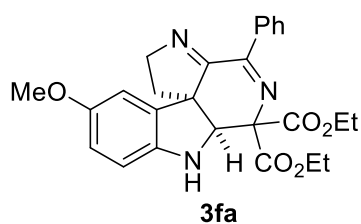

**diethyl 10-methoxyl-4-phenyl-1,2,6a,7-tetrahydro-6H-pyrrolo  
[3',2':4,5]pyrido[3,4-b] indole-6,6-dicarboxylate 3fa**

The reaction was run at rt for 37 h, affording product **3fa** in 57% yield (52.3 mg) as a yellow solid.  $R_f = 0.2$  (PE:EA:DCM = 5:1:1), m.p.

121-123 °C.

$^1\text{H}$  NMR (400 MHz,  $\text{CDCl}_3$ )  $\delta$  7.98 – 7.96 (m, 2H), 7.43 – 7.38 (m, 1H), 7.35 – 7.31 (m, 2H), 6.57 – 6.54 (m, 2H), 6.44 (d,  $J = 8.4$  Hz, 1H), 5.23 (s, 1H), 4.49 – 4.41 (m, 2H), 4.39 – 4.33 (m, 1H), 4.30 – 4.23 (m, 1H), 4.15 – 4.07 (m, 3H), 3.68 (s, 3H), 2.74 – 2.57 (m, 2H), 1.41 (t,  $J = 7.2$  Hz, 3H), 1.19 (t,  $J = 7.2$  Hz, 3H).

$^{13}\text{C}$  NMR (101 MHz,  $\text{CDCl}_3$ )  $\delta$  168.8, 168.2, 167.9, 166.6, 154.2, 143.1, 134.7, 132.7, 131.5, 128.6, 128.2, 114.1, 111.1, 109.3, 76.1, 71.4, 63.2, 62.6, 62.4, 60.4, 56.0, 41.2, 14.3, 13.9.

HRMS (ESI) calcd for  $\text{C}_{26}\text{H}_{28}\text{N}_3\text{O}_5$  ( $[\text{M}+\text{H}^+]$ ) = 462.2029, Found 462.2028.

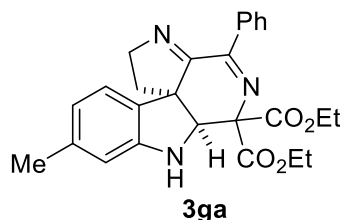

**diethyl 9-methyl-4-phenyl-1,2,6a,7-tetrahydro-6H-pyrrolo  
[3',2':4,5]pyrido[3,4-b] indole-6,6-dicarboxylate **3ga****

The reaction was run at rt for 27 h, affording product **3ga** in 81% yield (72.0 mg) as a yellow solid.  $R_f$  = 0.3 (PE:EA:DCM = 5:1:1), m.p.

167-169 °C.

$^1\text{H}$  NMR (400 MHz,  $\text{CDCl}_3$ )  $\delta$  7.96 – 7.94 (m, 2H), 7.41 – 7.31 (m, 3H), 6.86 (d,  $J$  = 7.6 Hz, 1H), 6.46 (d,  $J$  = 7.6 Hz, 1H), 6.30 (s, 1H), 5.22 (s, 1H), 4.49 – 4.40 (m, 2H), 4.38– 4.32 (m, 1H), 4.28 – 4.09 (m, 4H), 2.69 – 2.53 (m, 2H), 2.14 (s, 3H), 1.41 (t,  $J$  = 7.2 Hz, 3H), 1.19 (t,  $J$  = 7.2 Hz, 3H).

$^{13}\text{C}$  NMR (101 MHz,  $\text{CDCl}_3$ )  $\delta$  169.0, 168.4, 168.0, 166.5, 149.3, 139.2, 134.8, 131.4, 128.6, 128.2, 122.3, 120.5, 110.9, 76.1, 71.0, 62.6, 62.4, 62.4, 60.3, 41.2, 21.4, 14.2, 13.9.

HRMS (ESI) calcd for  $\text{C}_{26}\text{H}_{28}\text{N}_3\text{O}_4$  ( $[\text{M}+\text{H}^+]$ ) = 446.2080, Found 446.2079.

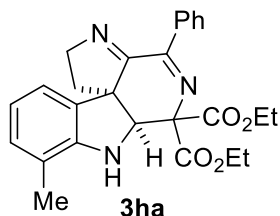

**diethyl 8-methyl-4-phenyl-1,2,6a,7-tetrahydro-6H-pyrrolo  
[3',2':4,5]pyrido[3,4-b] indole-6,6-dicarboxylate **3ha****

The reaction was run at rt for 37 h, affording product **3ha** in 63% yield (55.8 mg) as a yellow solid.  $R_f$  = 0.3 (PE:EA:DCM = 5:1:1), m.p.

145-147 °C.

$^1\text{H}$  NMR (400 MHz,  $\text{CDCl}_3$ )  $\delta$  7.92 – 7.90 (m, 2H), 7.42 – 7.37 (m, 1H), 7.35 – 7.31 (m, 2H), 6.85 (d,  $J$  = 7.6 Hz, 1H), 6.80 (d,  $J$  = 7.6 Hz, 1H), 6.61 (t,  $J$  = 7.6 Hz, 1H), 5.24 (d,  $J$  = 4.8 Hz, 1H), 4.47 (q,  $J$  = 6.8 Hz, 2H), 4.41– 4.33 (m, 1H), 4.18 – 4.11 (m, 3H), 4.00 (d,  $J$  = 4.8 Hz, 1H), 2.70 – 2.55 (m, 2H), 2.00 (s, 3H), 1.40 (t,  $J$  = 7.2 Hz, 3H), 1.20 (t,  $J$  = 7.2 Hz, 3H).

$^{13}\text{C}$  NMR (101 MHz,  $\text{CDCl}_3$ )  $\delta$  169.1, 168.5, 168.0, 166.5, 147.9, 134.9, 131.4, 130.4, 129.9, 128.7, 128.2, 120.0, 120.0, 119.6, 119.6, 76.3, 70.7, 62.9, 62.6, 62.4, 60.3, 41.5, 16.7, 14.3, 13.9.

HRMS (ESI) calcd for  $\text{C}_{26}\text{H}_{28}\text{N}_3\text{O}_4$  ( $[\text{M}+\text{H}^+]$ ) = 446.2080, Found 446.2079

## 4. Experimental procedure for the scale-up reaction and transformation of the product

### a) Scale-up version of the reaction

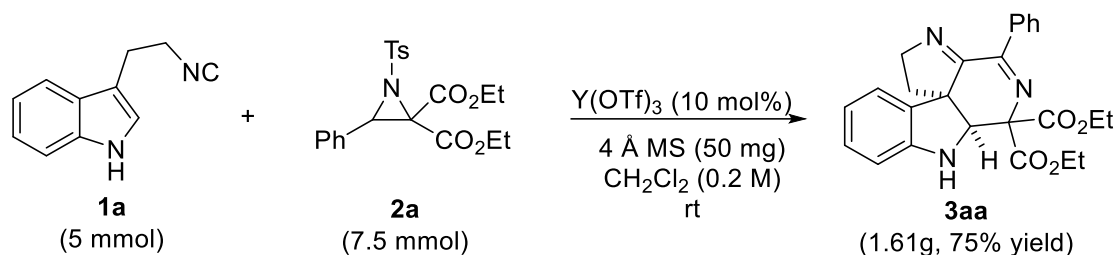

**Procedure:** A dry reaction tube was charged with **1a** (5 mmol, 0.85 g), **2a** (7.5 mmol, 3.13 g) and 4 Å MS (1.25 g). Under N<sub>2</sub> atmosphere, CH<sub>2</sub>Cl<sub>2</sub> (12.5 mL) was added. The mixture was stirred at room temperature for 15 min, then Y(OTf)<sub>3</sub> (0.5 mmol, 267 mg) and dry CH<sub>2</sub>Cl<sub>2</sub> (12.5 mL) was added in the tube. The reaction mixture continued stirring at room temperature for 20 h. The solvent was removed under reduced pressure and the residue was directly purified by flash chromatography on silica gel using petroleum ether/ethyl acetate/dichloromethane = 5/1/1 as eluent to afford the desired product **3aa** in 75% yield (1.61g).

### b) Transformations of the product **3aa**

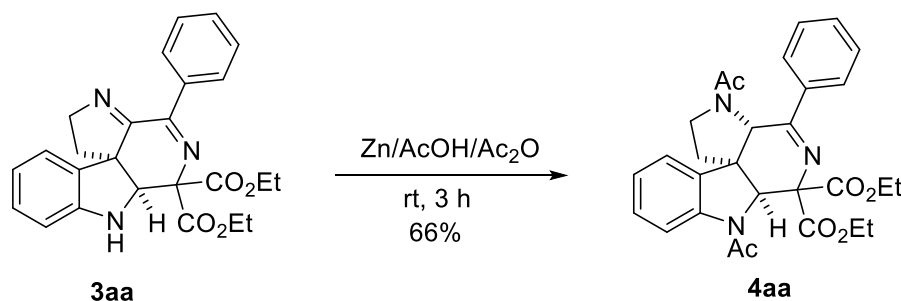

**Procedure:** A dry round-bottom flask was charged with **3aa** (0.5 mmol, 216 mg), AcOH (4 mL) and Ac<sub>2</sub>O (4 mL). Then Zn power (2.5 mmol, 162.5 mg) was slowly added to the reaction mixture. The reaction mixture was stirred at room temperature for 3 h. The precipitate was filtered out and the solvent was removed under reduced pressure. Saturated aqueous Na<sub>2</sub>CO<sub>3</sub> was added to the mixture to adjust the pH of solution to 8.0-9.0. Then the solution was diluted with ethyl acetate, washed with water, dried with Na<sub>2</sub>SO<sub>4</sub>, and concentrated under reduced pressure. The residue was directly purified by flash chromatography on silica gel using petroleum ether/ethyl acetate = 1/4 as eluent to afford the desired product **4aa** in 66% yield.

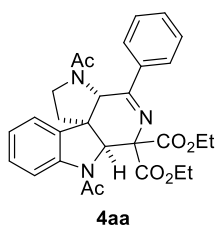

**diethyl-3,7-diacetyl-4-phenyl-1,2,3,3a,6a,7-hexahydro-6H-pyrrolo[3',2':4,5]pyrido[3,4-b]indole-6,6-dicarboxylate **4aa****

The reaction was run at rt for 3 h, affording product **4aa** in 66% yield (171 mg) as a white solid.  $R_f = 0.3$  (PE:EA = 1:4), m.p. 143-145 °C.

$^1\text{H NMR}$  (400 MHz,  $\text{CDCl}_3$ )  $\delta$  7.64 (s, 2H), 7.44 – 7.39 (m, 1H), 7.34 – 7.28 (m, 3H), 7.23 (t,  $J = 7.6$  Hz, 1H), 7.02 – 6.97 (m, 1H), 6.94 – 6.88 (m, 1H), 5.28 (s, 1H), 5.09 (s, 1H), 4.32 – 4.15 (m, 2H), 4.08 – 4.00 (m, 1H), 3.92 – 3.84 (m, 1H), 3.73 – 3.66 (m, 1H), 3.61 – 3.51 (m, 1H), 2.43 (s, 3H), 2.27 – 2.18 (m, 2H), 1.97 (s, 3H), 1.26 (t,  $J = 7.2$  Hz, 3H), 1.11 (t,  $J = 7.2$  Hz, 3H).

$^{13}\text{C NMR}$  (101 MHz,  $\text{CDCl}_3$ )  $\delta$  170.2, 169.9, 169.6, 168.6, 143.0, 130.3, 129.8, 129.1, 128.9, 128.6, 127.9, 127.8, 127.5, 124.8, 121.9, 65.0, 63.0, 62.8, 62.6, 62.2, 46.1, 39.9, 23.9, 21.8, 13.9, 13.8.

HRMS (ESI) calcd for  $\text{C}_{29}\text{H}_{32}\text{N}_3\text{O}_6$  ( $[\text{M}+\text{H}^+]$ ) = 518.2291, Found 518.2299.

## 5. X-ray Structures of **3aa** and **4aa**.

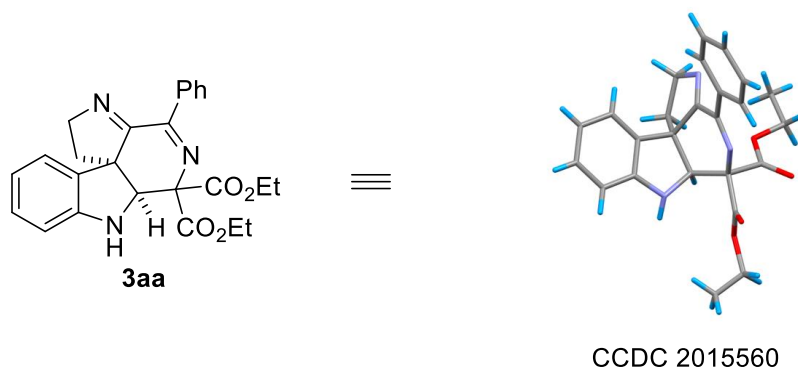

Single crystal of compound **3aa** [C<sub>25</sub>H<sub>25</sub>N<sub>3</sub>O<sub>4</sub>] was obtained in PE and EtOAc. CCDC 2015560 contains the supplementary crystallographic data which can be obtained free of charge from the Cambridge Crystallographic Data Center via <https://www.ccdc.cam.ac.uk/structures/>.

### Crystal data

|                                    |                                                               |
|------------------------------------|---------------------------------------------------------------|
| Empirical formula                  | C <sub>25</sub> H <sub>25</sub> N <sub>3</sub> O <sub>4</sub> |
| Formula weight                     | 431.48                                                        |
| Temperature/K                      | 293.15                                                        |
| Crystal system                     | orthorhombic                                                  |
| Space group                        | P2 <sub>1</sub> 2 <sub>1</sub> 2 <sub>1</sub>                 |
| a/Å                                | 11.3360(4)                                                    |
| b/Å                                | 11.9463(3)                                                    |
| c/Å                                | 16.0968(7)                                                    |
| α/°                                | 90                                                            |
| β/°                                | 90                                                            |
| γ/°                                | 90                                                            |
| Volume/Å <sup>3</sup>              | 2179.89(14)                                                   |
| Z                                  | 4                                                             |
| ρ <sub>calc</sub> /cm <sup>3</sup> | 1.315                                                         |
| μ/mm <sup>-1</sup>                 | 0.090                                                         |
| F(000)                             | 912.0                                                         |
| Crystal size/mm <sup>3</sup>       | 0.35 × 0.3 × 0.25                                             |
| Radiation                          | MoKα (λ = 0.71073)                                            |
| 2θ range for data collection/°     | 6.104 to 52.738                                               |
| Index ranges                       | -14 ≤ h ≤ 13, -14 ≤ k ≤ 9, -11 ≤ l ≤ 20                       |
| Reflections collected              | 6852                                                          |
| Independent reflections            | 3988 [R <sub>int</sub> = 0.0220, R <sub>sigma</sub> = 0.0485] |
| Data/restraints/parameters         | 3988/1/295                                                    |
| Goodness-of-fit on F <sup>2</sup>  | 1.028                                                         |



Final R indexes [ $I \geq 2\sigma(I)$ ]  $R_1 = 0.0567$ ,  $wR_2 = 0.1245$   
 Final R indexes [all data]  $R_1 = 0.0834$ ,  $wR_2 = 0.1399$   
 Largest diff. peak/hole /  $e \text{ \AA}^{-3}$  0.41/-0.31  
 Flack parameter 0.4(9)

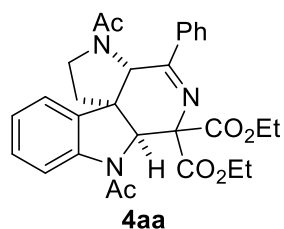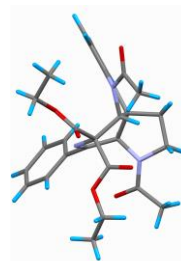

CCDC 2104294

Single crystal of compound **4aa** [ $C_{29}H_{31}N_3O_6$ ] was obtained in PE and EtOAc. CCDC 2104294 contains the supplementary crystallographic data which can be obtained free of charge from the Cambridge Crystallographic Data Center via <https://www.ccdc.cam.ac.uk/structures/>.

### Crystal data

|                                               |                                                                    |
|-----------------------------------------------|--------------------------------------------------------------------|
| Empirical formula                             | $C_{29}H_{31}N_3O_6$                                               |
| Formula weight                                | 517.57                                                             |
| Temperature/K                                 | 293.15                                                             |
| Crystal system                                | monoclinic                                                         |
| Space group                                   | $I2/a$                                                             |
| $a/\text{\AA}$                                | 15.8169(18)                                                        |
| $b/\text{\AA}$                                | 16.0922(13)                                                        |
| $c/\text{\AA}$                                | 23.146(2)                                                          |
| $\alpha/^\circ$                               | 90                                                                 |
| $\beta/^\circ$                                | 105.329(13)                                                        |
| $\gamma/^\circ$                               | 90                                                                 |
| Volume/ $\text{\AA}^3$                        | 5681.8(10)                                                         |
| Z                                             | 8                                                                  |
| $\rho_{\text{calc}}/\text{cm}^3$              | 1.210                                                              |
| $\mu/\text{mm}^{-1}$                          | 0.085                                                              |
| $F(000)$                                      | 2192.0                                                             |
| Crystal size/ $\text{mm}^3$                   | $0.35 \times 0.3 \times 0.25$                                      |
| Radiation                                     | $\text{MoK}\alpha$ ( $\lambda = 0.71073$ )                         |
| $2\theta$ range for data collection/ $^\circ$ | 6.032 to 52.742                                                    |
| Index ranges                                  | $-19 \leq h \leq 11$ , $-16 \leq k \leq 20$ , $-24 \leq l \leq 28$ |
| Reflections collected                         | 13458                                                              |
| Independent reflections                       | 5791 [ $R_{\text{int}} = 0.0296$ , $R_{\text{sigma}} = 0.0642$ ]   |

Data/restraints/parameters 5791/4/351  
Goodness-of-fit on  $F^2$  1.049  
Final R indexes [ $I \geq 2\sigma(I)$ ]  $R_1 = 0.0639$ ,  $wR_2 = 0.1670$   
Final R indexes [all data]  $R_1 = 0.1098$ ,  $wR_2 = 0.1906$   
Largest diff. peak/hole /  $e \text{ \AA}^{-3}$  0.36/-0.24

## 6. References

1. H. Liu, A. Domling, *J. Org. Chem.*, **2009**, *74*, 6895-6898.
2. X. W, L. Li, J. L. Zhang, *Adv. Synth. Catal.* **2012**, *354*, 3485-34

## 7. Copy of $^1\text{H}$ NMR and $^{13}\text{C}$ NMR Spectra

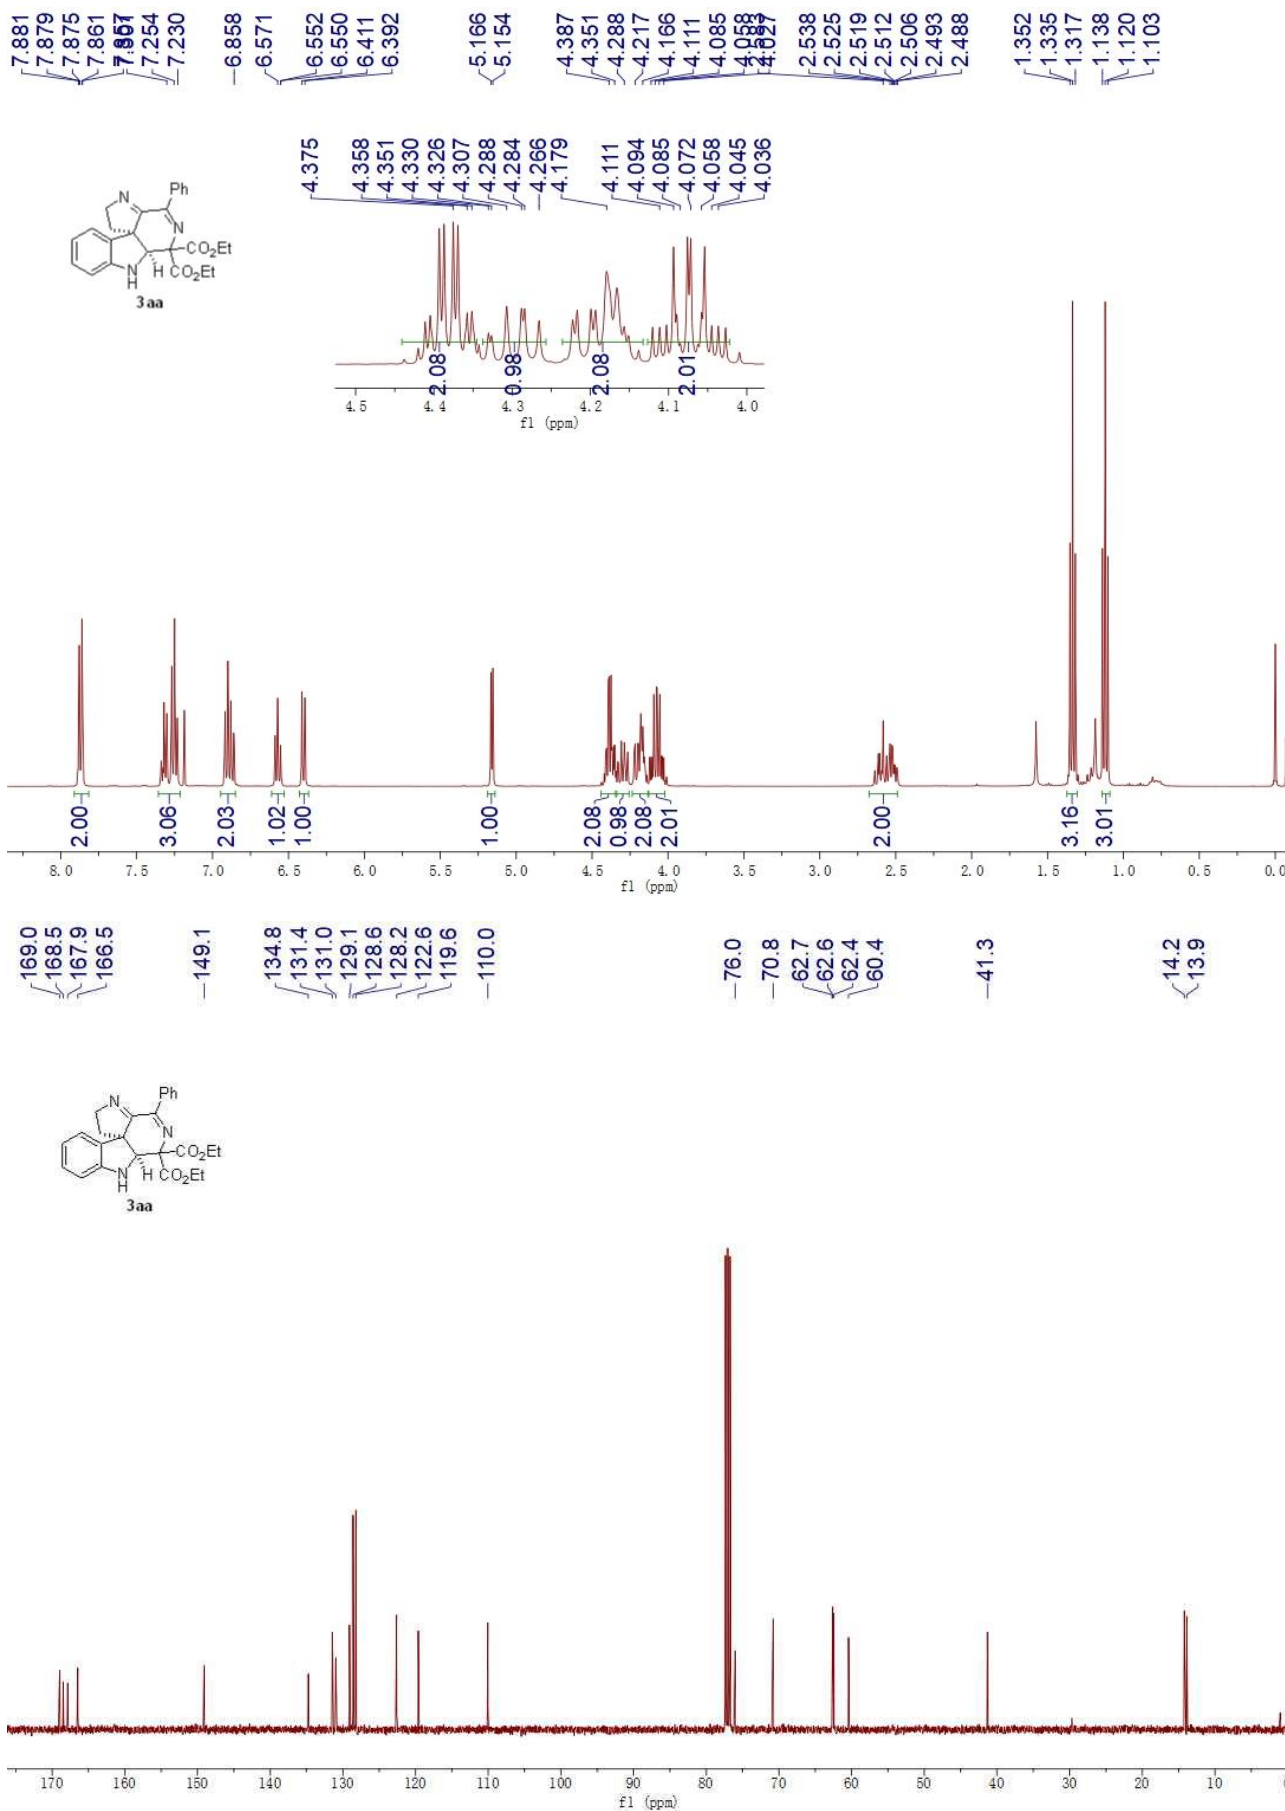

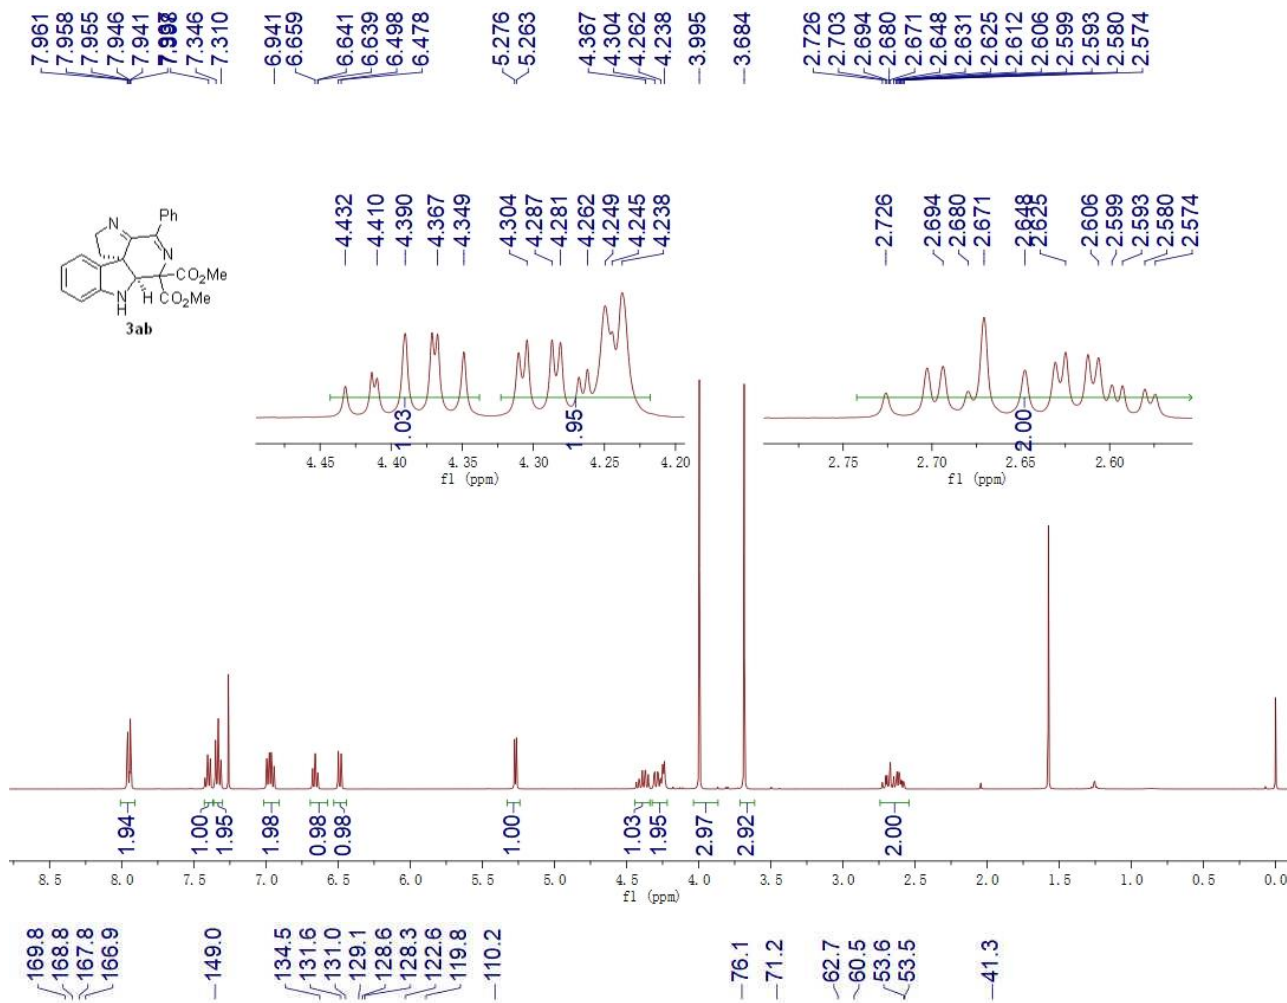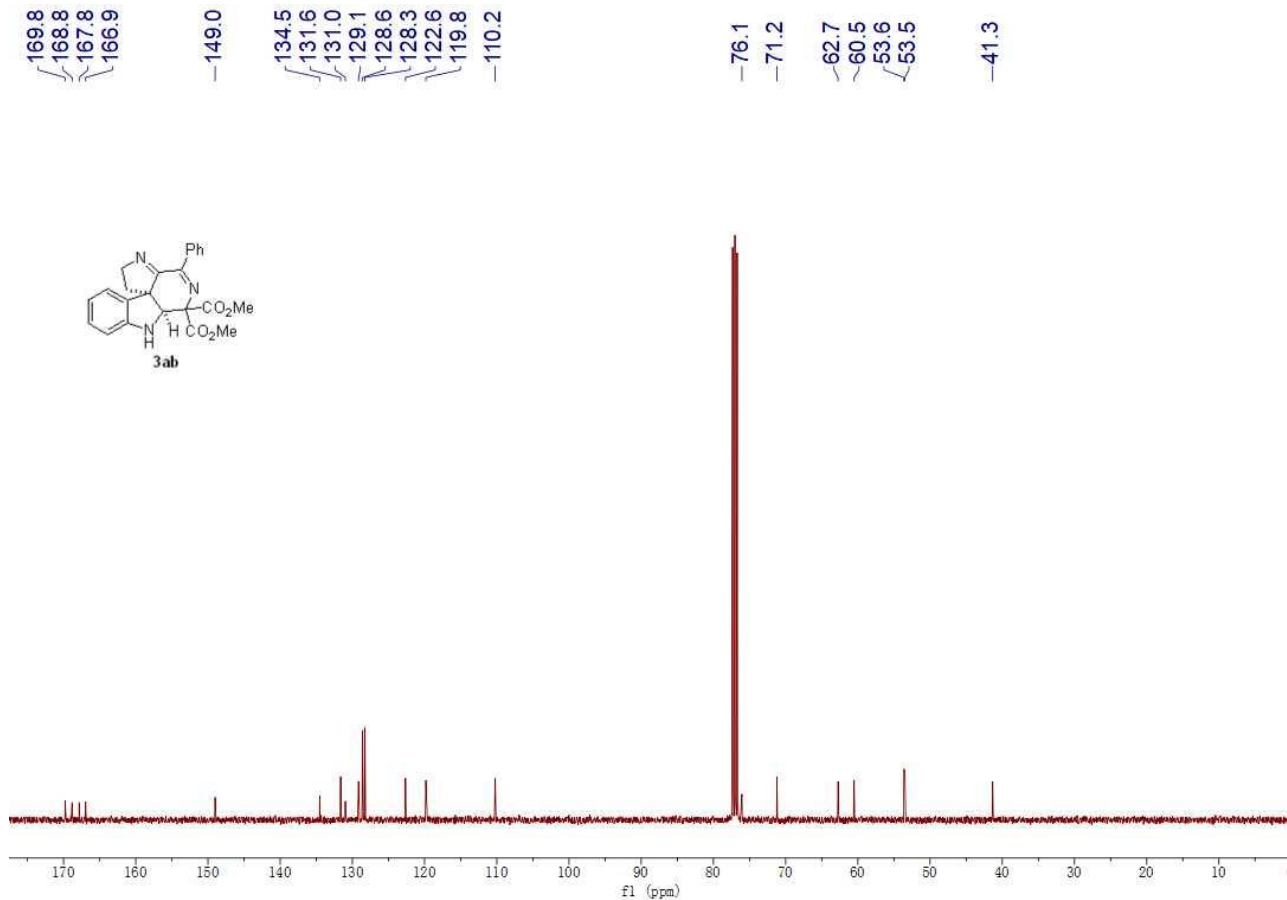

8.020  
8.016  
8.011  
7.831  
7.828  
7.825  
7.812  
7.808  
7.805  
7.359  
7.239  
8.845  
8.852  
6.634  
6.496  
6.478  
6.475  
5.236  
5.226  
4.470  
4.387  
4.302  
4.259  
4.231  
4.231  
4.175  
4.140  
4.140  
4.105  
2.676  
2.653  
2.621  
2.611  
2.592  
2.579  
2.561  
1.433  
1.415  
1.397  
1.217  
1.200  
1.182

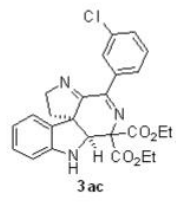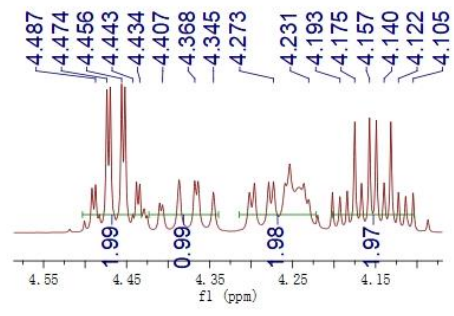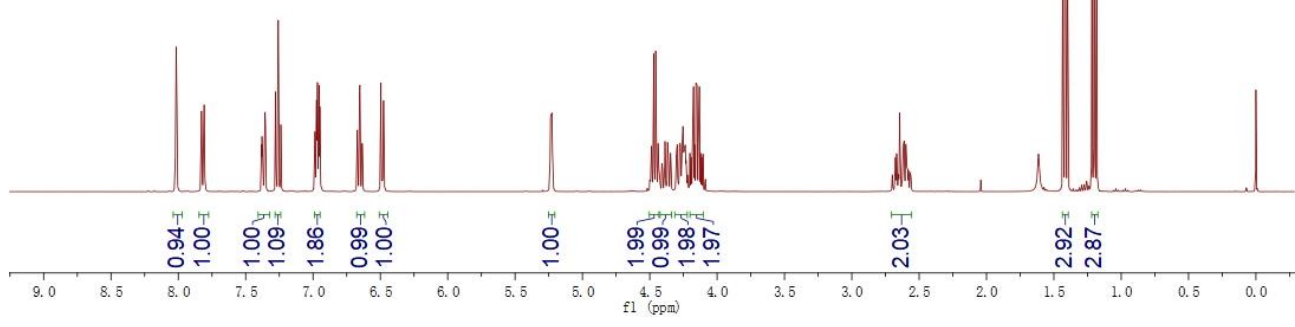

168.8  
167.5  
167.2  
166.2  
149.0  
136.3  
134.5  
131.5  
130.8  
129.5  
129.2  
128.2  
127.0  
122.6  
119.8  
110.1  
76.2  
70.8  
62.7  
62.7  
60.5  
41.2  
14.2  
13.9

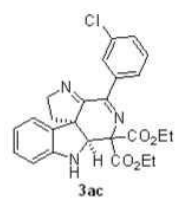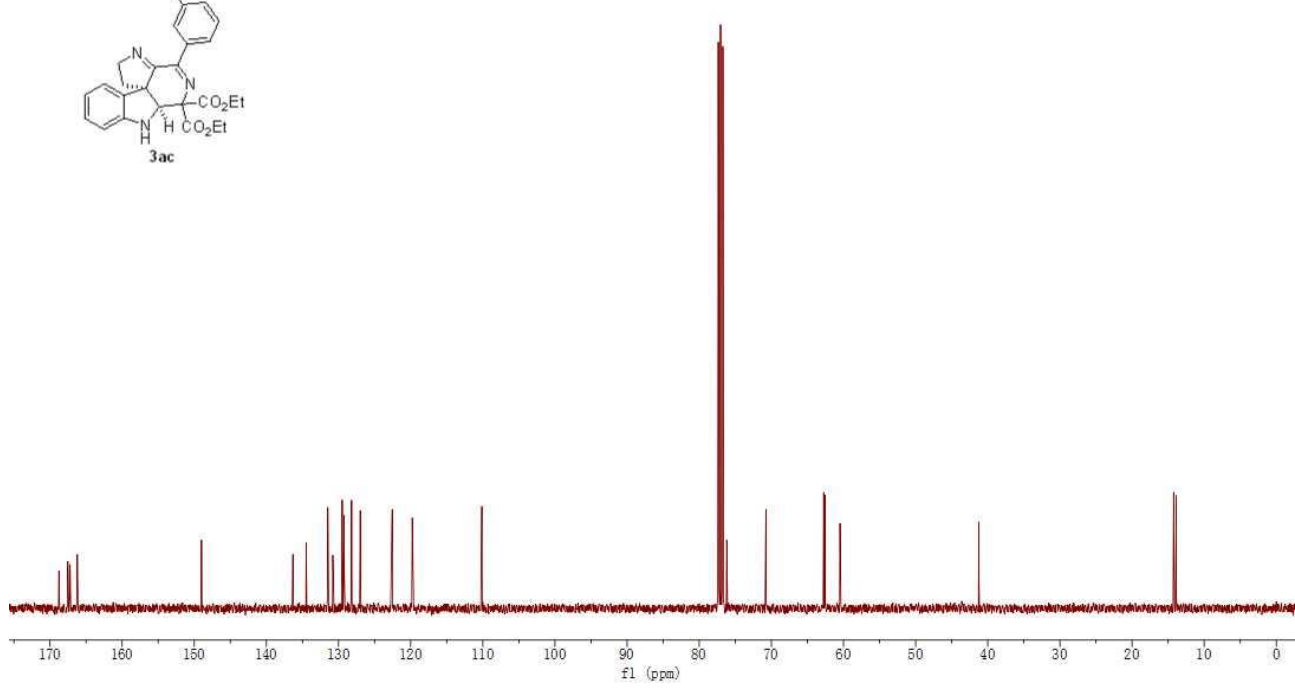

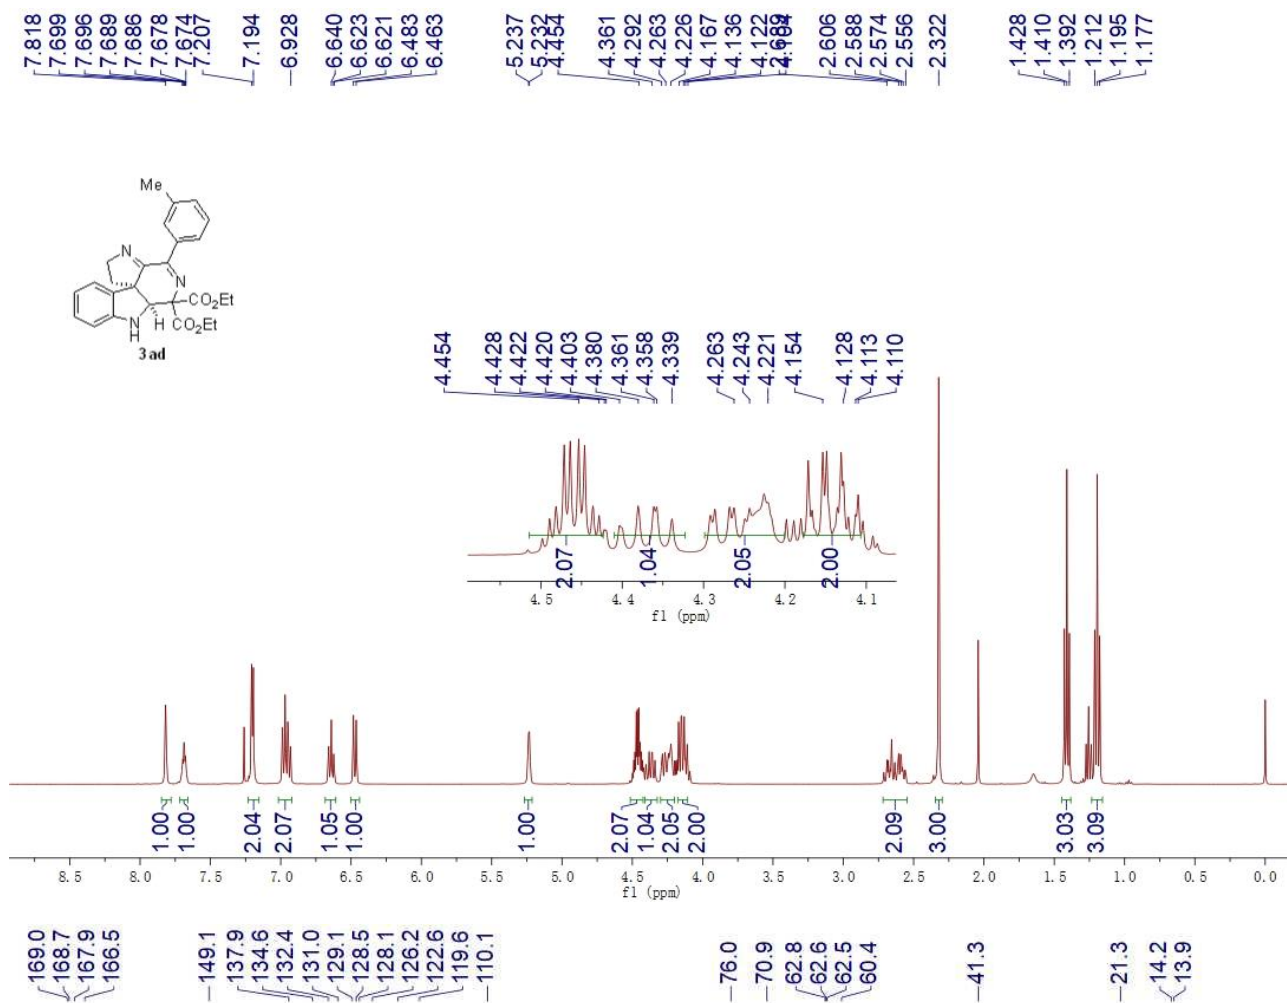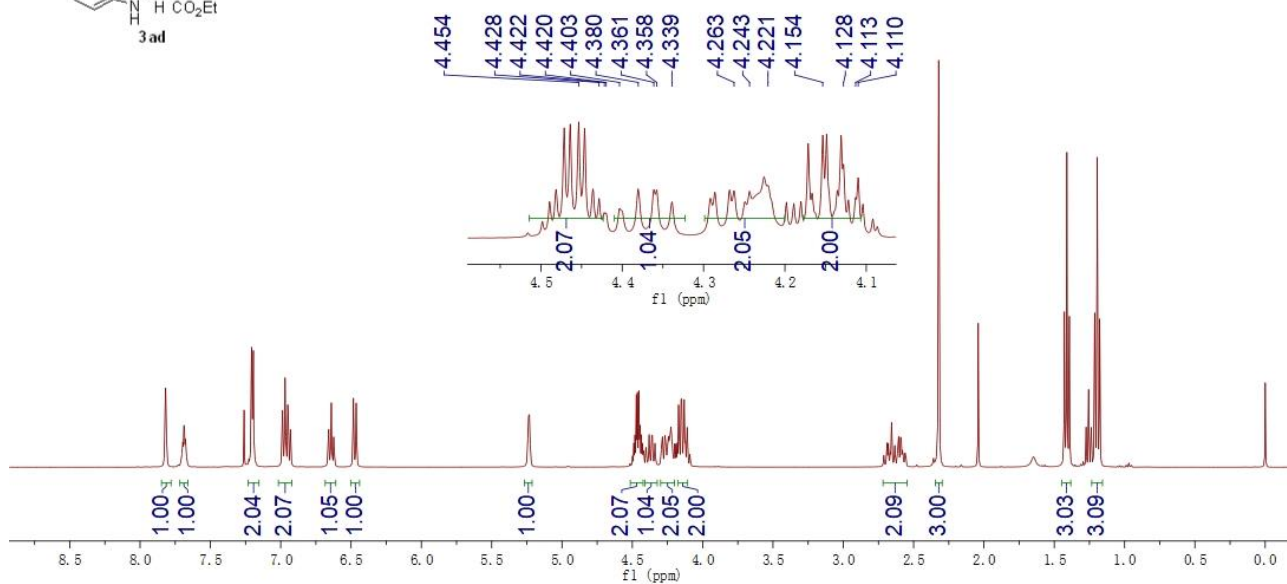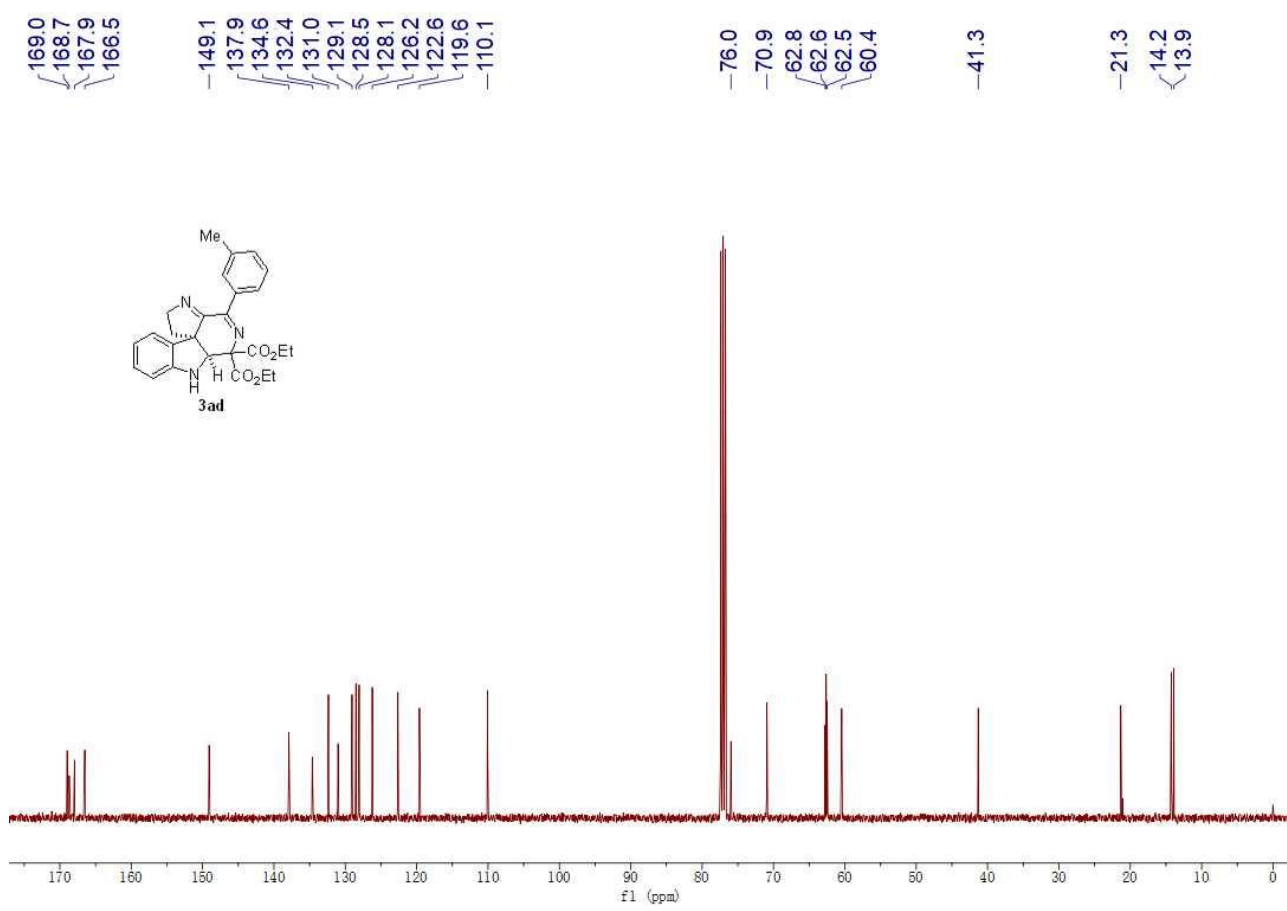

8.004  
7.999  
7.990  
7.987  
7.985  
7.981  
7.973  
7.968  
7.002  
6.965  
6.941

6.662  
6.643  
6.624  
6.495  
6.474

-5.223

4.462

4.377  
4.300  
4.257  
4.215  
4.171  
4.135

4.085  
2.886  
2.662  
2.630  
2.611  
2.593  
2.579  
2.561

1.428  
1.410  
1.392  
1.212  
1.194  
1.177

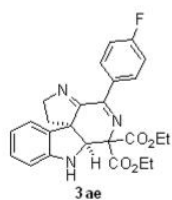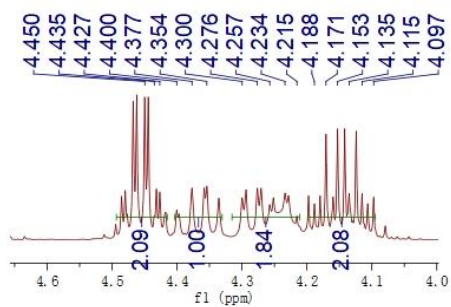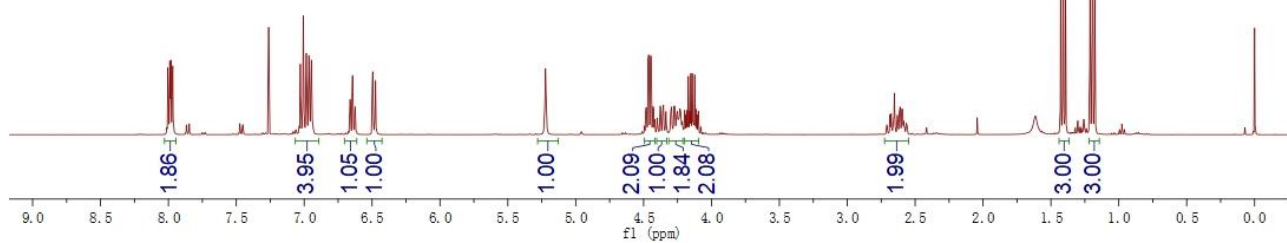

168.88  
167.77  
167.17  
166.38

-149.03

130.90  
130.88  
130.82  
129.17

-119.70  
-115.21  
-110.15

-75.99  
-70.69  
62.67  
62.65  
62.49  
60.44

-41.25

14.23  
13.88

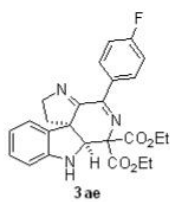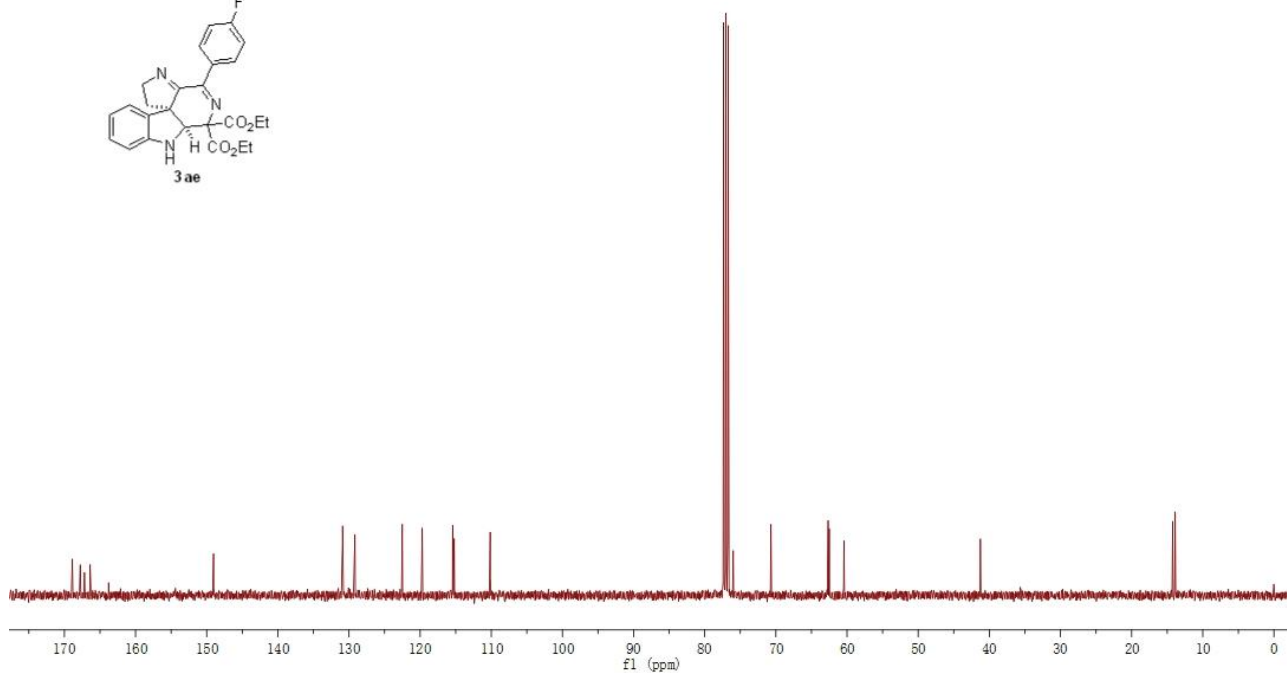



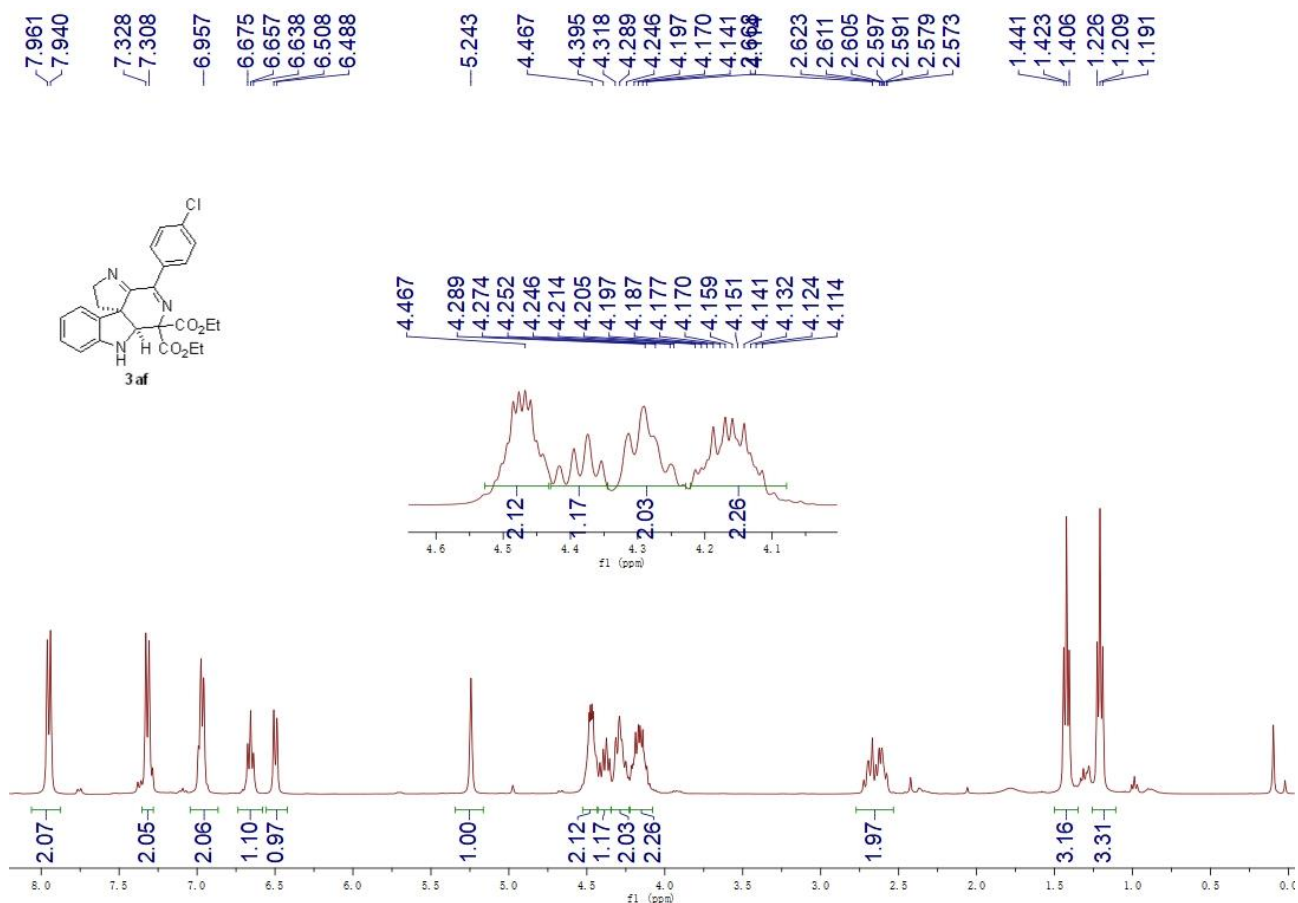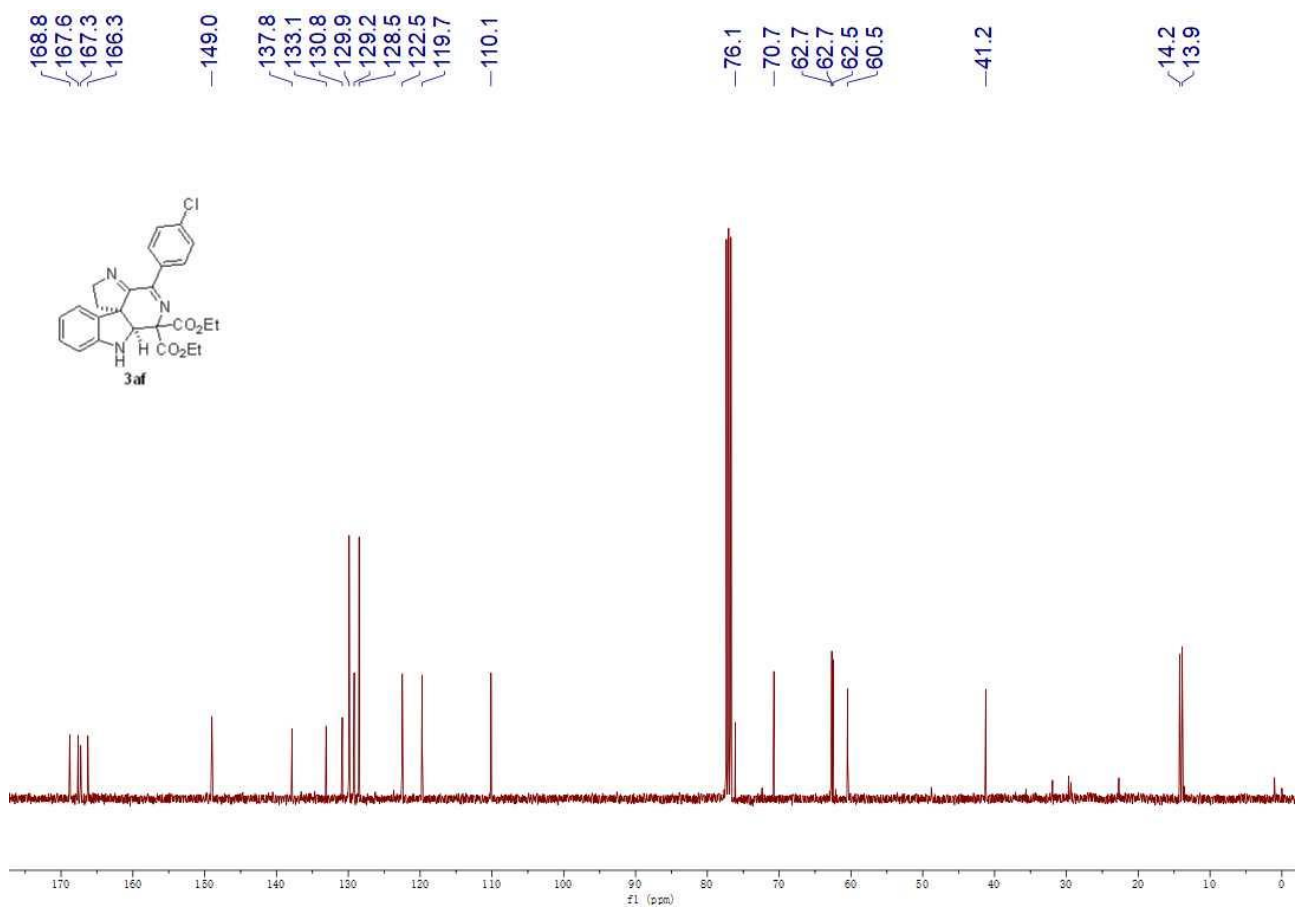

7.897  
7.891  
7.886  
7.874  
7.869  
7.863  
7.481  
7.476  
6.957

6.662  
6.646  
6.643  
6.516  
6.497

5.250  
5.241

4.467  
4.440  
4.379  
4.316  
4.273  
4.235  
4.191  
4.155  
2.690  
2.670  
2.647  
2.636  
2.630  
2.617  
2.611  
2.604

1.451  
1.433  
1.415  
1.232  
1.214  
1.196

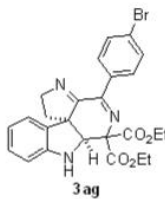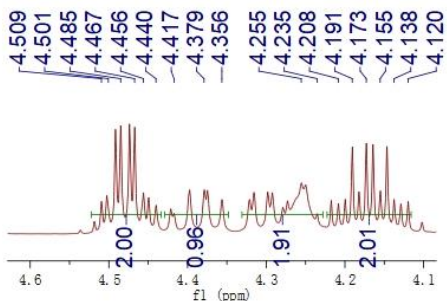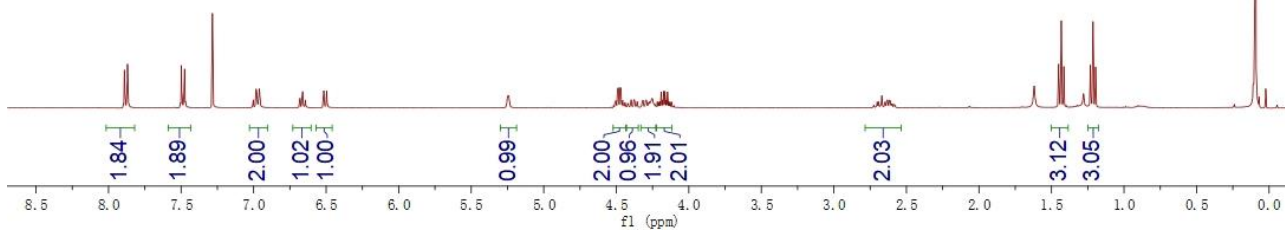

168.8  
167.6  
167.4  
166.2

149.0

131.5  
130.8  
130.1  
129.2  
126.5  
122.5  
119.7

110.1

76.1

70.7

62.7  
62.7  
62.5  
60.5

41.2

14.2  
13.9

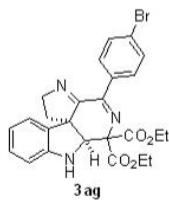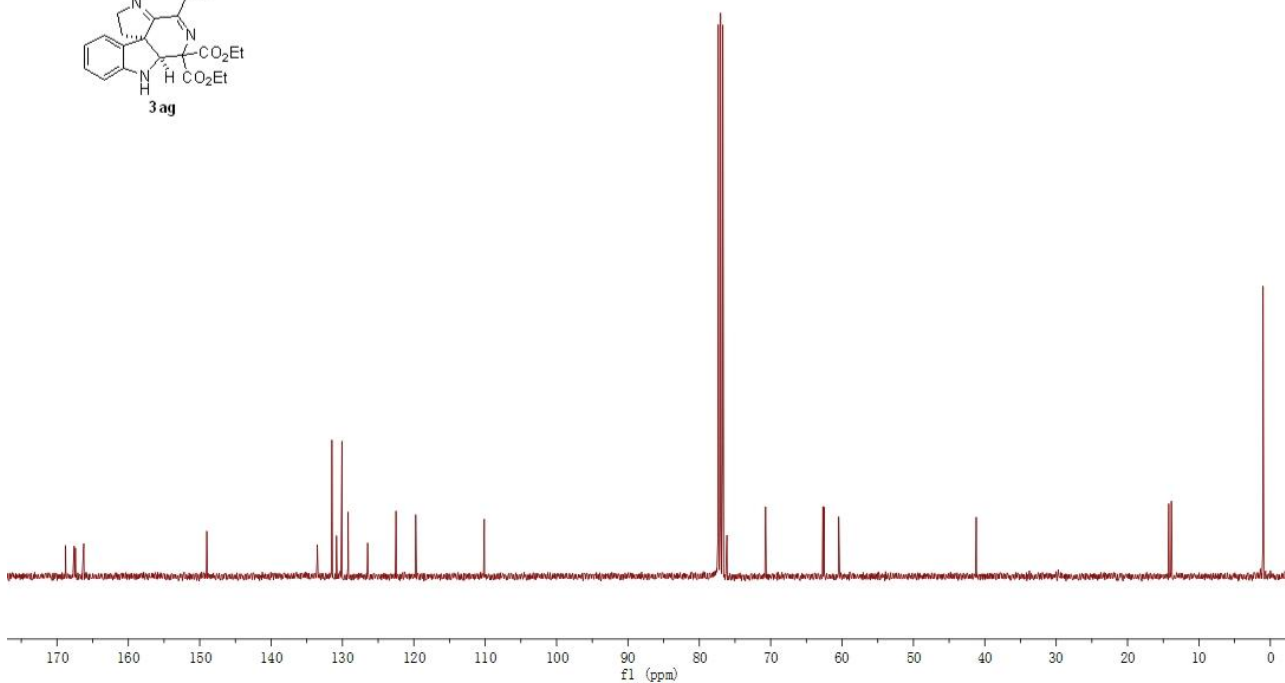

8.047  
8.031  
8.021  
7.568  
7.396  
7.337  
7.257  
-6.942  
6.656  
6.639  
6.637  
6.499  
6.479  
-5.247  
4.464  
4.428  
4.385  
4.312  
4.269  
4.207  
4.175  
4.144  
4.112  
2.627  
2.614  
2.609  
2.601  
2.595  
2.582  
2.577  
1.438  
1.420  
1.403  
1.223  
1.205  
1.187

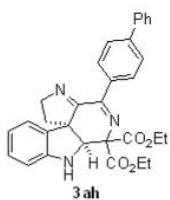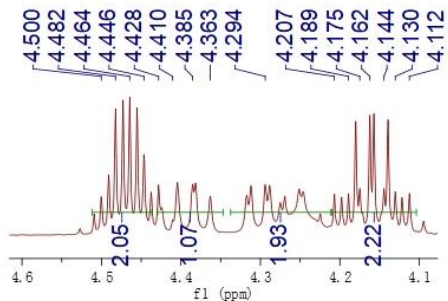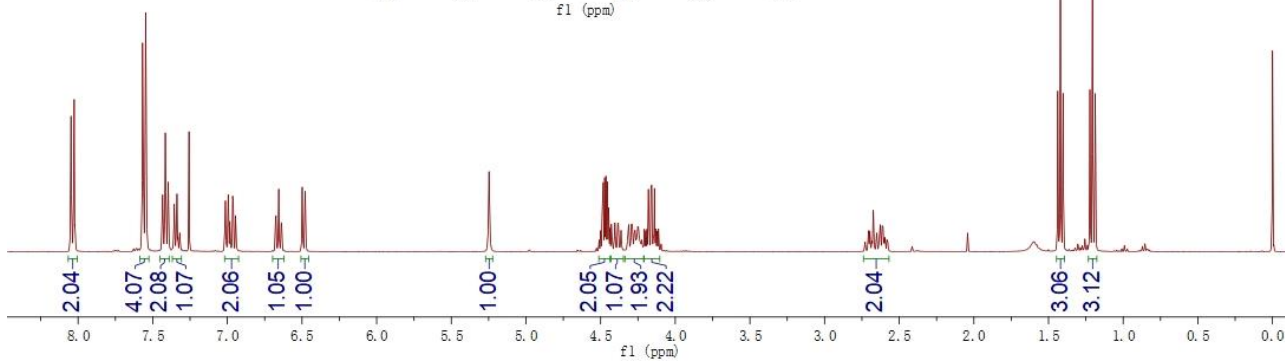

169.0  
168.0  
167.9  
166.5  
149.1  
144.1  
140.5  
133.6  
131.0  
129.1  
129.1  
128.8  
127.7  
127.2  
127.0  
122.6  
119.7  
110.1  
-76.1  
-70.8  
62.7  
62.6  
62.5  
60.5  
-41.3  
14.3  
13.9

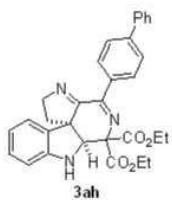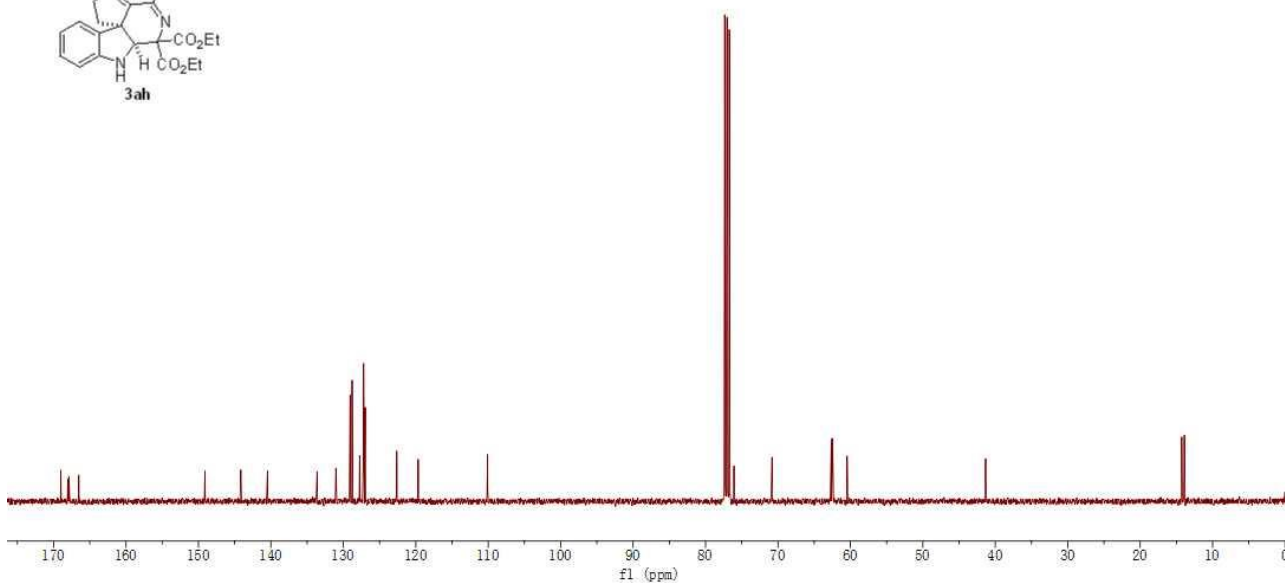

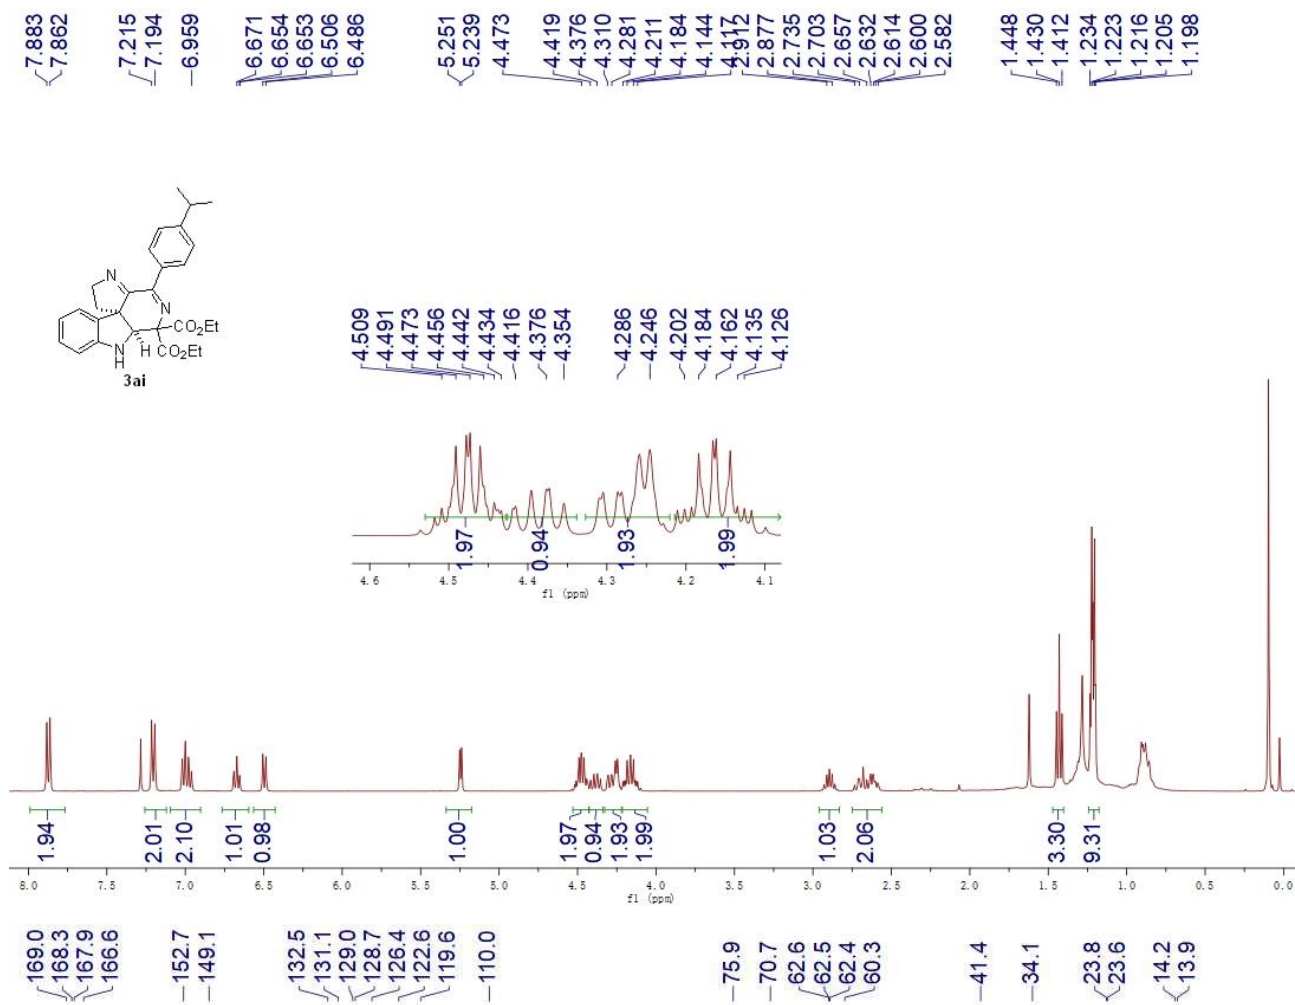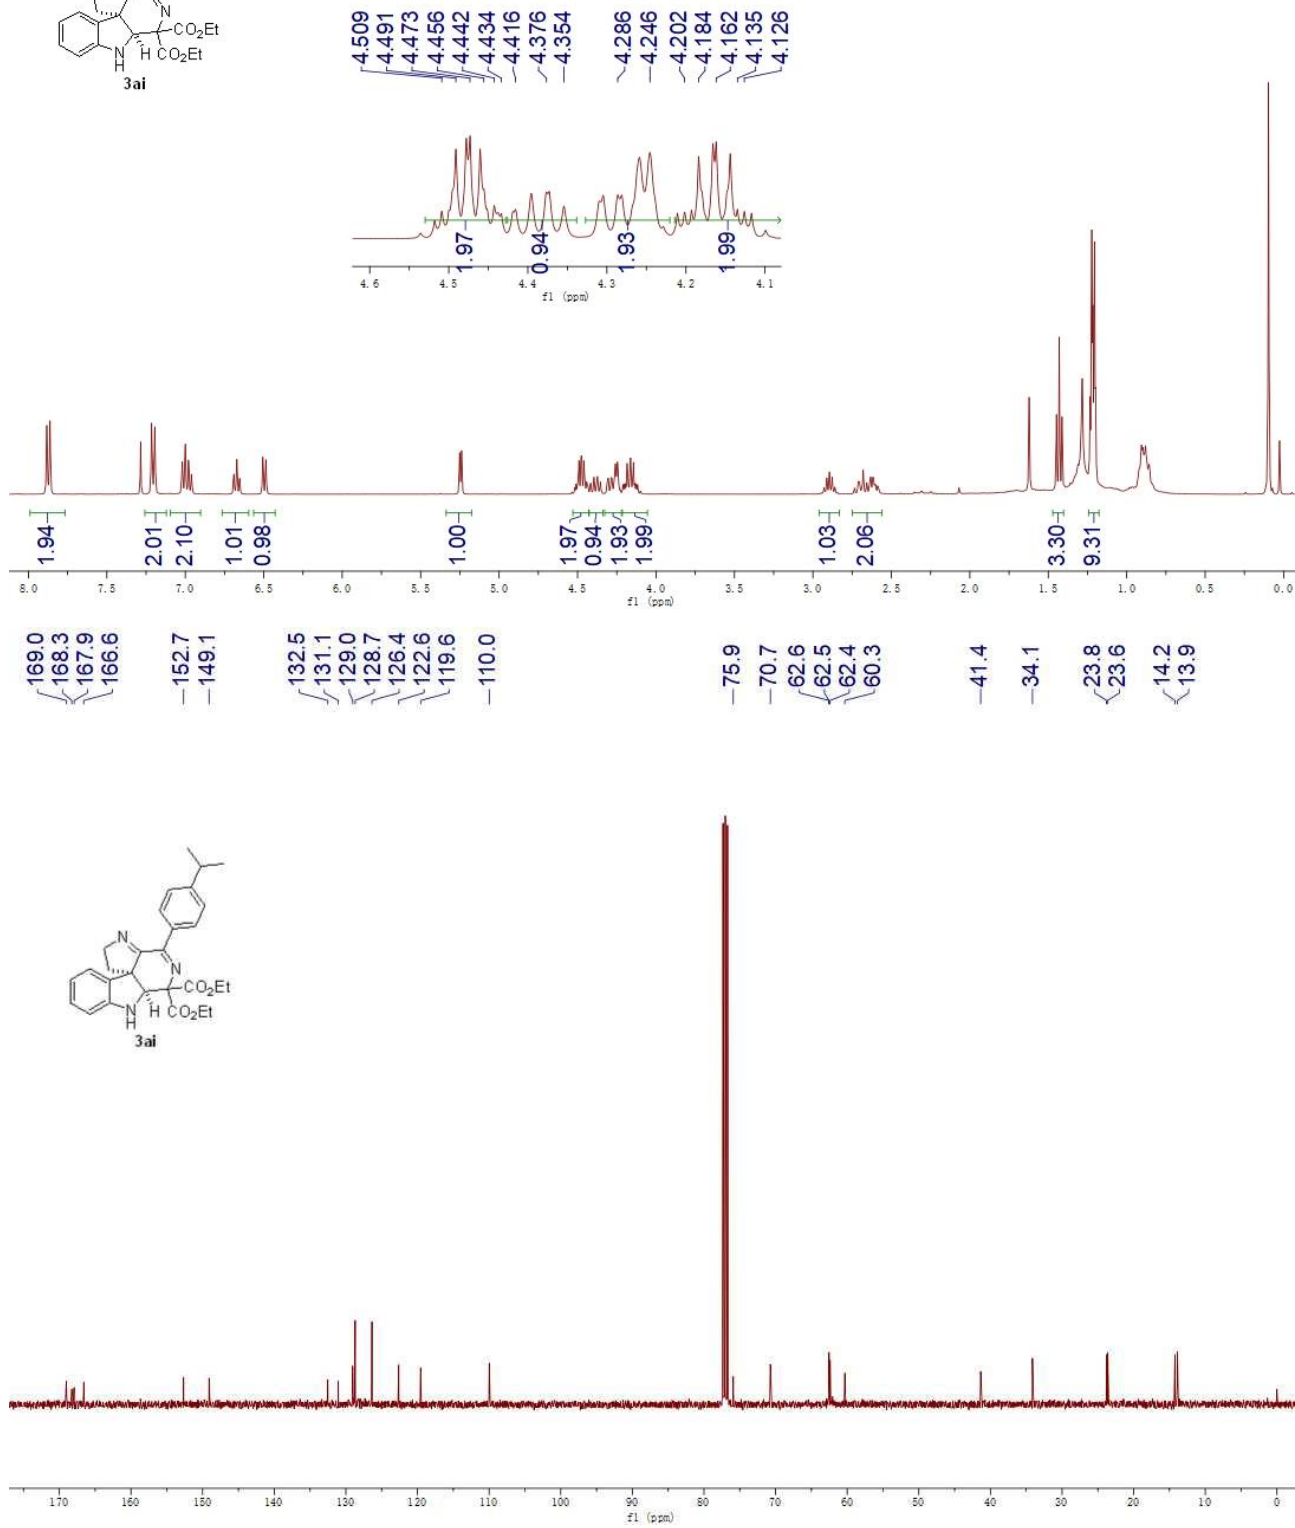

8.315  
8.294  
7.822  
7.761  
7.311  
7.036  
6.752  
6.734  
6.715  
6.549  
6.535  
5.318  
4.435  
4.373  
4.306  
4.265  
4.239  
4.216  
4.187  
4.156  
4.110  
2.654  
2.641  
2.633  
2.623  
2.615  
1.409  
1.391  
1.373  
1.305  
1.288  
1.270

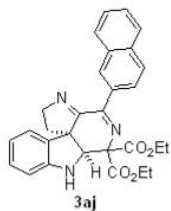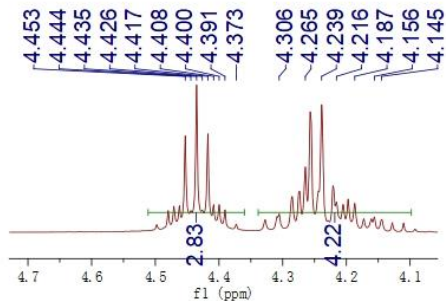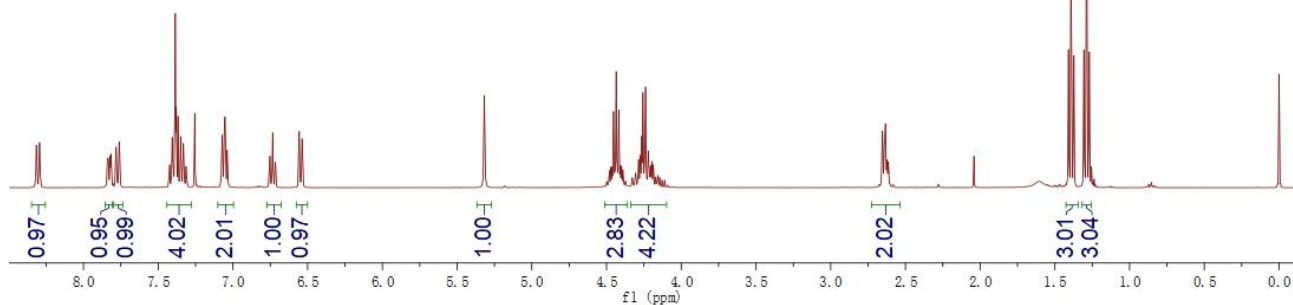

171.1  
169.4  
168.9  
166.5  
149.3  
133.9  
133.0  
131.1  
131.0  
130.8  
129.5  
129.1  
128.1  
126.8  
126.0  
125.9  
124.7  
123.1  
119.4  
109.9  
76.2  
70.1  
62.8  
62.5  
62.2  
60.2  
41.0  
14.2  
14.0

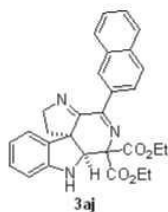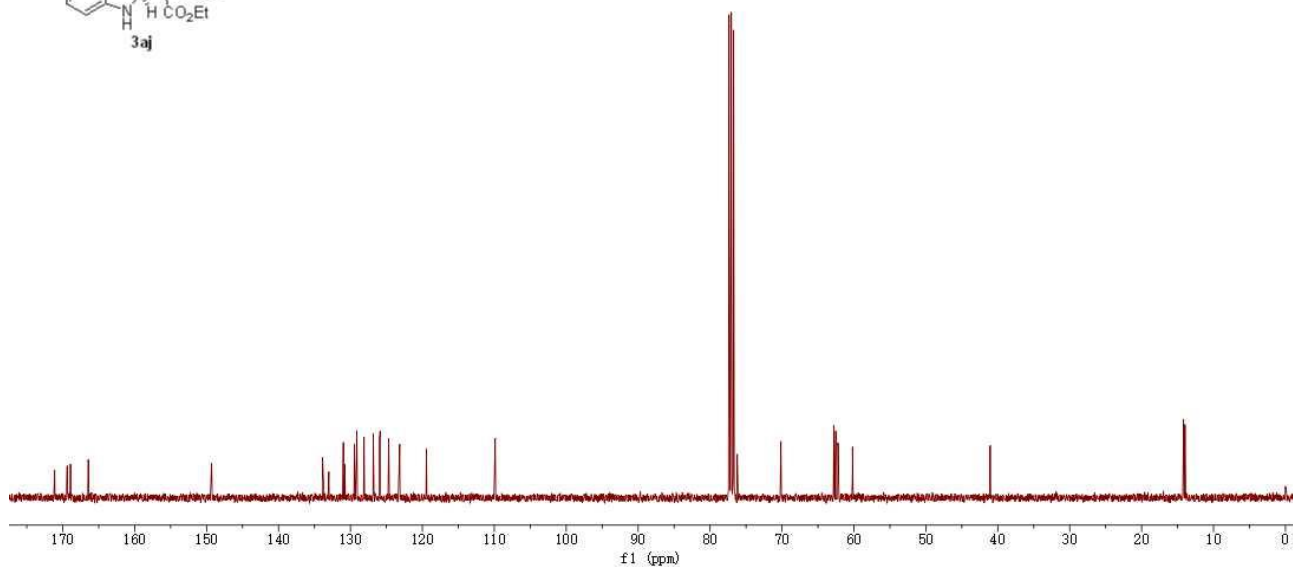

7.994  
7.976  
7.460  
7.435  
7.388  
6.993  
6.919  
6.423  
6.417  
6.407  
6.401  
5.274  
4.485  
4.418  
4.375  
4.330  
4.301  
4.264  
4.206  
4.185  
4.149  
2.623  
2.611  
2.605  
2.597  
2.591  
2.579  
2.573  
1.448  
1.431  
1.413  
1.233  
1.216  
1.198

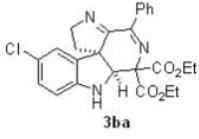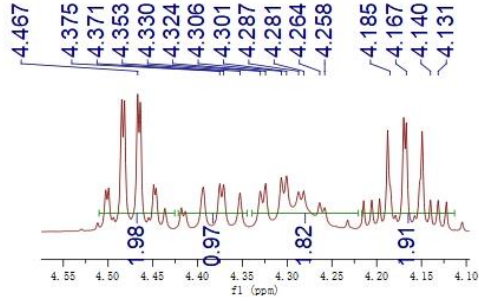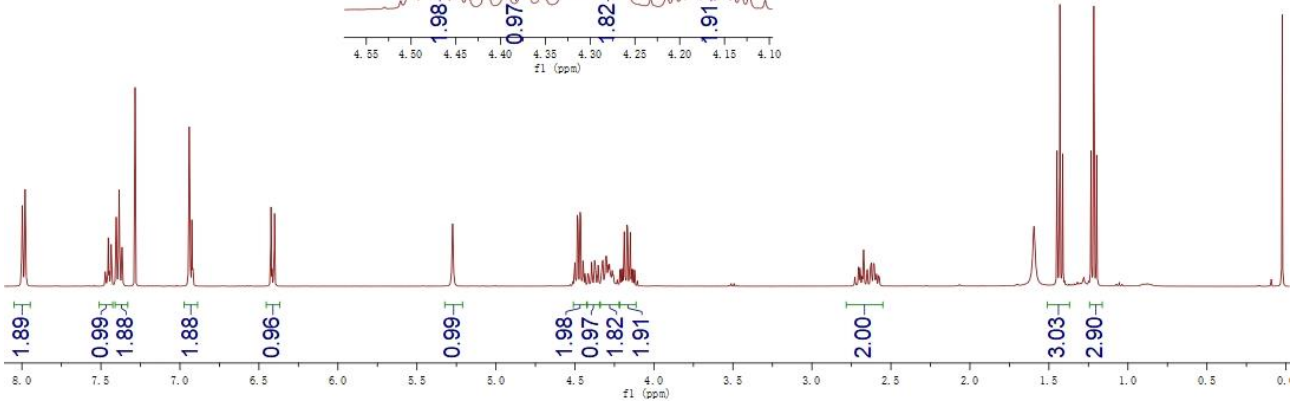

168.9  
168.3  
167.2  
166.3  
147.7  
134.5  
132.7  
131.6  
129.1  
128.5  
128.3  
123.8  
122.7  
110.7  
75.8  
71.2  
62.7  
62.6  
62.6  
60.4  
41.2  
14.2  
13.9

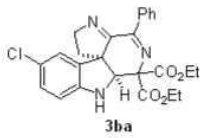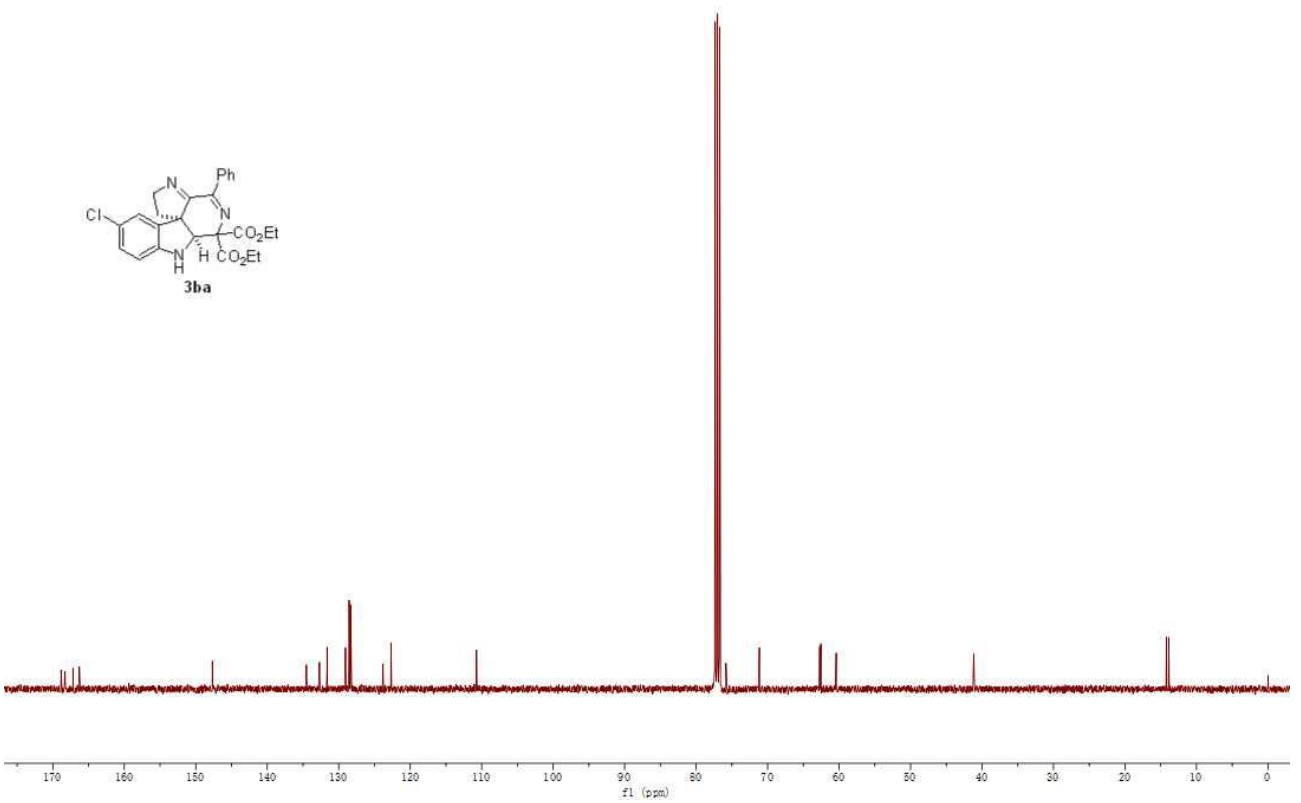



7.978  
7.973  
7.973  
7.970  
7.967  
7.958  
7.953  
7.949  
7.411  
7.340  
7.045  
7.020  
6.353  
6.350  
6.333  
6.331

5.240

4.452  
4.417  
4.347  
4.277  
4.229  
4.158  
4.125  
4.095  
2.671  
2.647  
2.615  
2.595  
2.577  
2.563  
2.545

1.418  
1.400  
1.383  
1.207  
1.189  
1.171

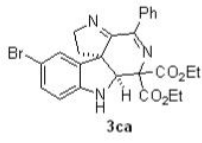

4.452  
4.434  
4.421  
4.408  
4.386  
4.347  
4.325  
4.295  
4.271  
4.252  
4.229  
4.170  
4.153  
4.131  
4.113  
4.105

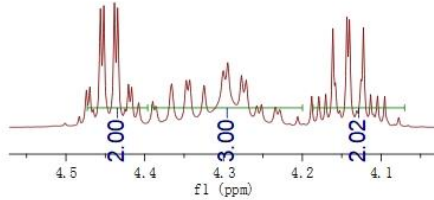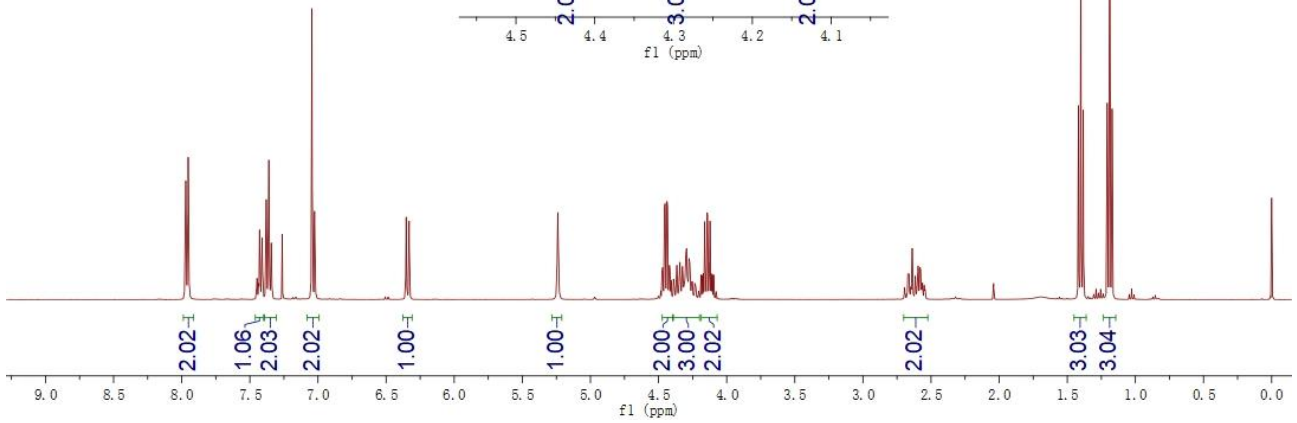

168.9  
168.3  
167.2  
166.3  
148.2  
134.5  
133.2  
131.9  
131.7  
128.6  
128.4  
125.5  
111.2  
110.6

75.8  
71.1  
62.7  
62.6  
62.5  
60.4

41.2

14.2  
13.9

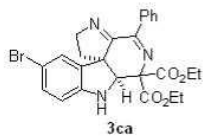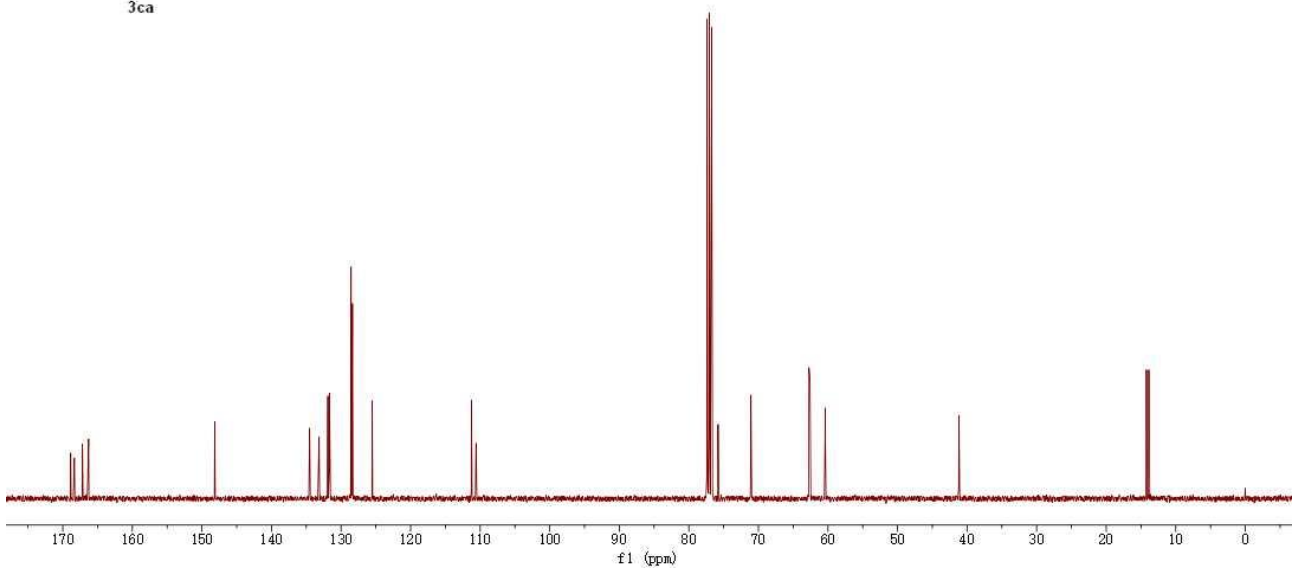

7.957  
7.954  
7.951  
7.942  
7.937  
**7.908**  
7.354  
7.318  
6.863  
6.843  
6.587  
6.572  
6.567  
6.426  
6.421  
5.246  
5.234  
4.435  
4.408  
4.367  
4.306  
4.259  
4.240  
4.216  
4.177  
4.159  
**4.138**  
4.094  
2.556  
2.544  
2.538  
2.530  
2.524  
2.512  
2.507  
1.410  
1.392  
1.374  
1.202  
1.185  
1.167

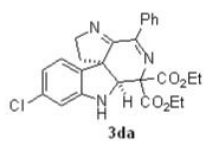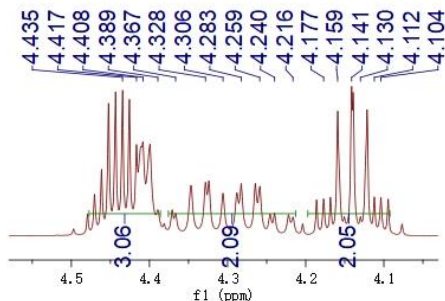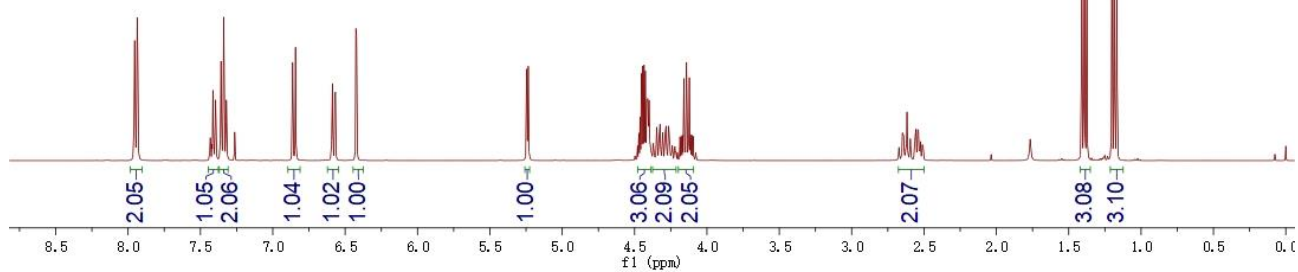

168.9  
168.4  
167.3  
166.3  
150.2  
134.8  
134.6  
131.6  
129.5  
128.5  
128.3  
123.3  
119.3  
109.9  
75.8  
71.1  
62.7  
62.6  
62.0  
60.4  
41.1  
14.2  
13.9

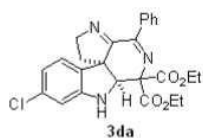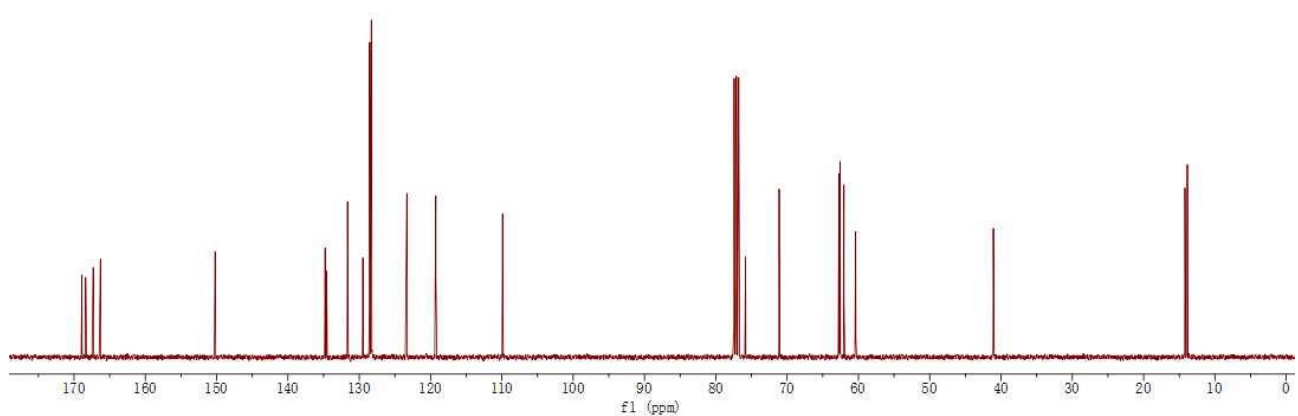



7.998  
7.994  
7.990  
7.977  
7.973  
7.360  
7.335  
6.801  
6.771  
6.425  
6.405

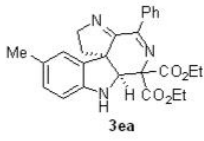

-5.240  
4.459  
4.425  
4.383  
4.290  
4.248  
4.196  
4.162  
4.140  
4.118  
2.687  
2.655  
2.619  
2.601  
2.588  
2.569  
-2.200  
1.445  
1.427  
1.409  
1.232  
1.214  
1.197

4.484  
4.466  
4.449  
4.432  
4.425  
4.414  
4.388  
-4.365  
4.285  
4.257  
4.239  
4.196  
4.176  
4.158  
4.145  
4.127  
4.118

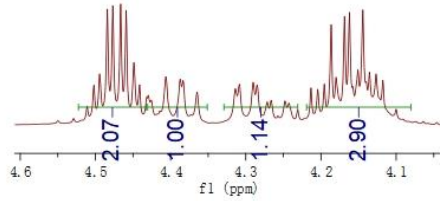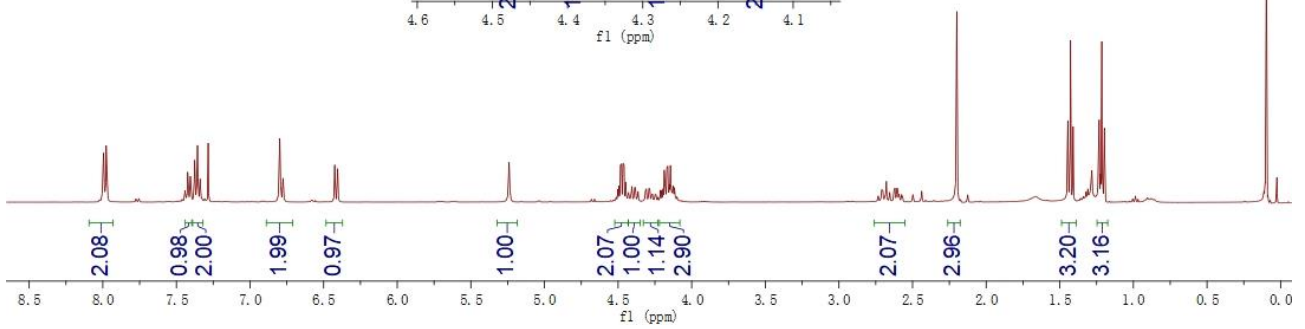

168.9  
168.3  
168.1  
166.5  
-146.8  
131.4  
129.1  
128.6  
128.2  
-123.1  
-110.1  
-76.1  
-71.1  
62.8  
62.5  
62.4  
60.4  
-41.3  
-20.8  
14.2  
13.9

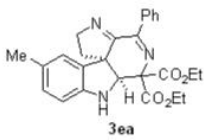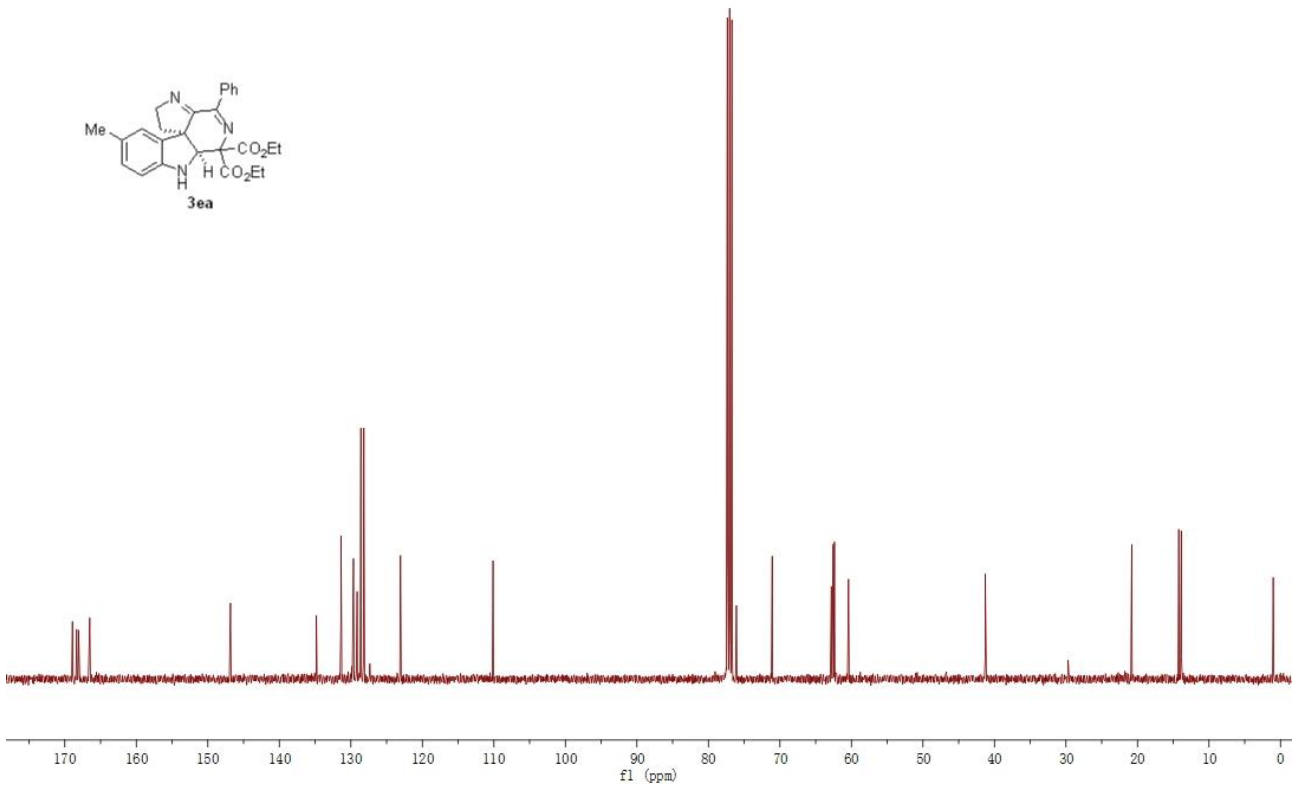

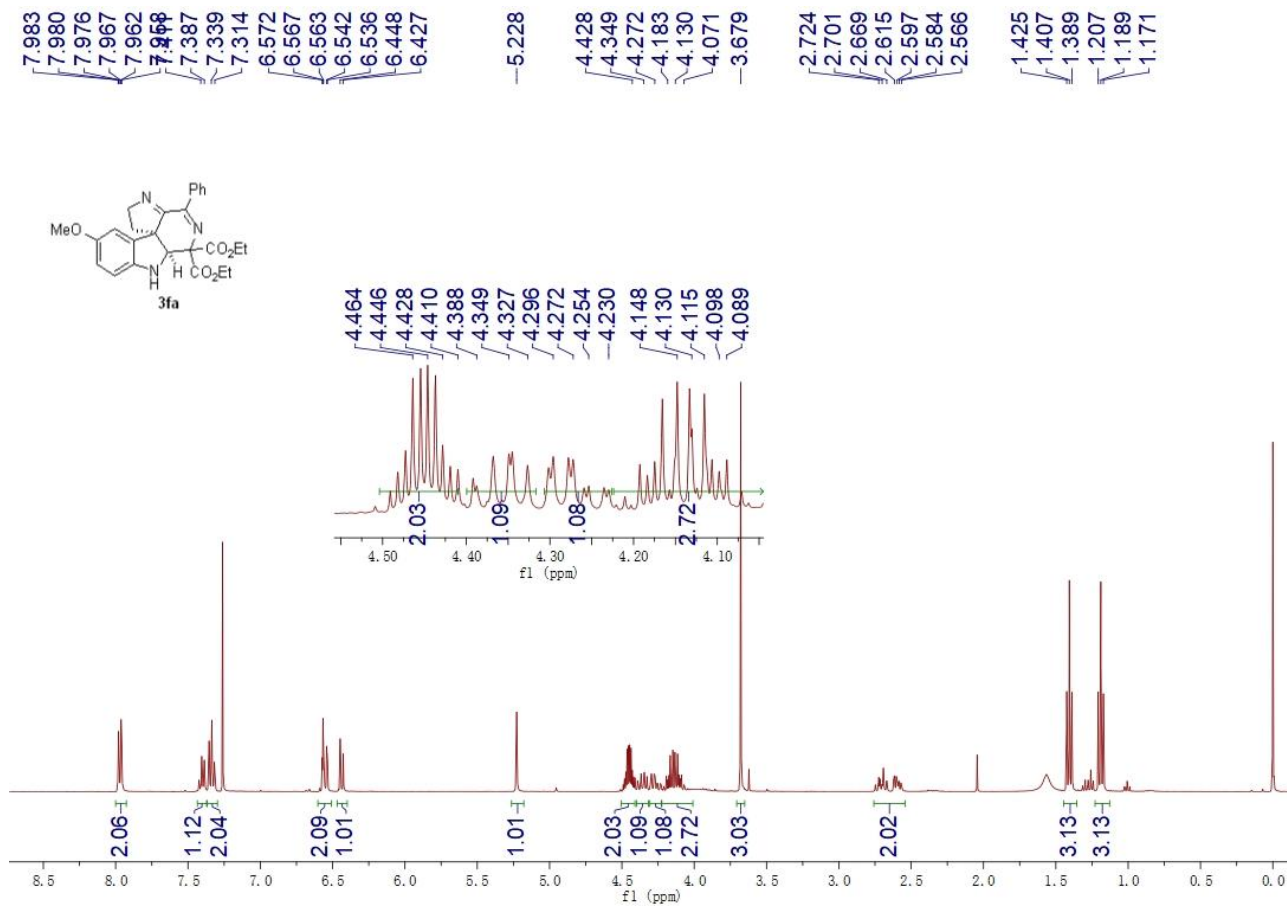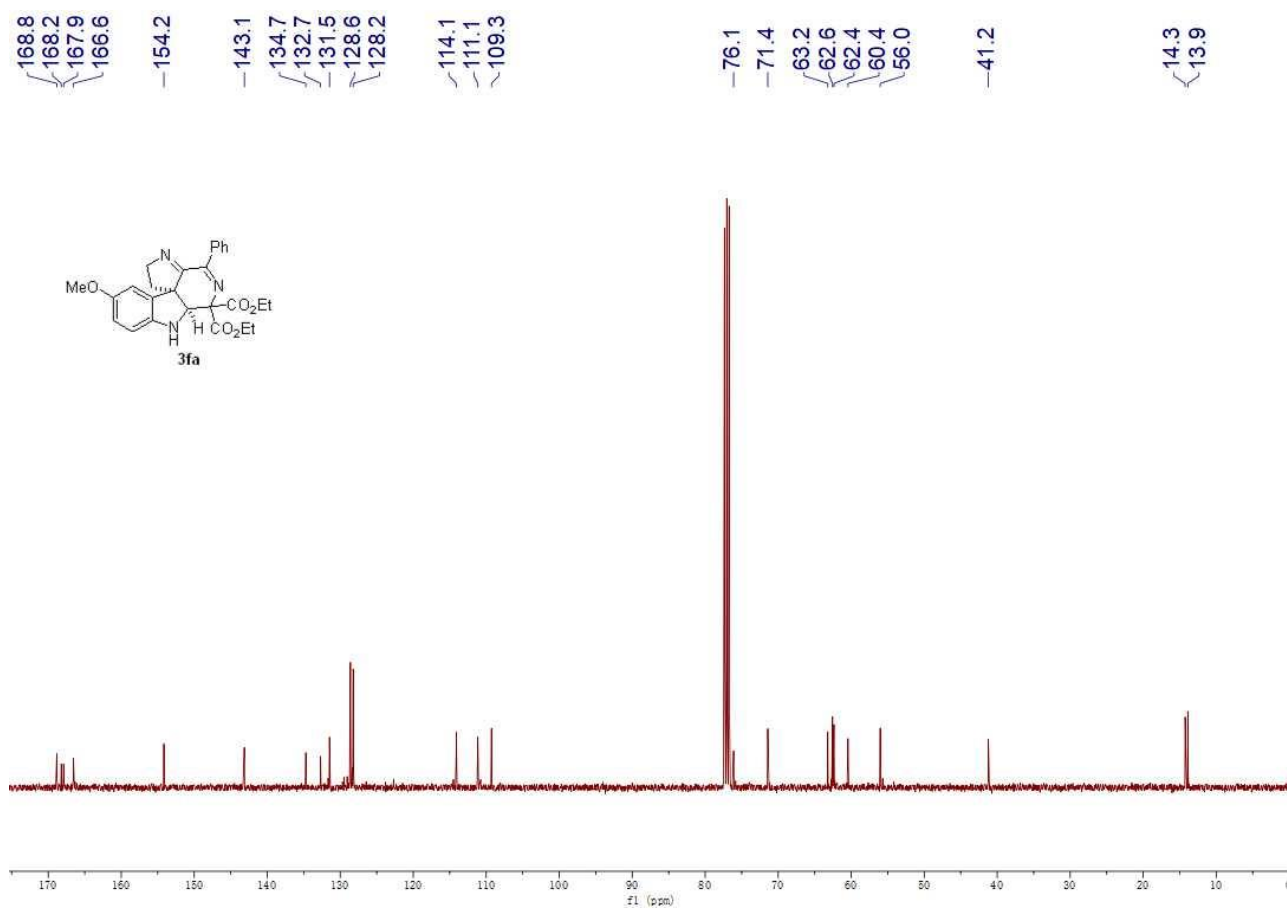

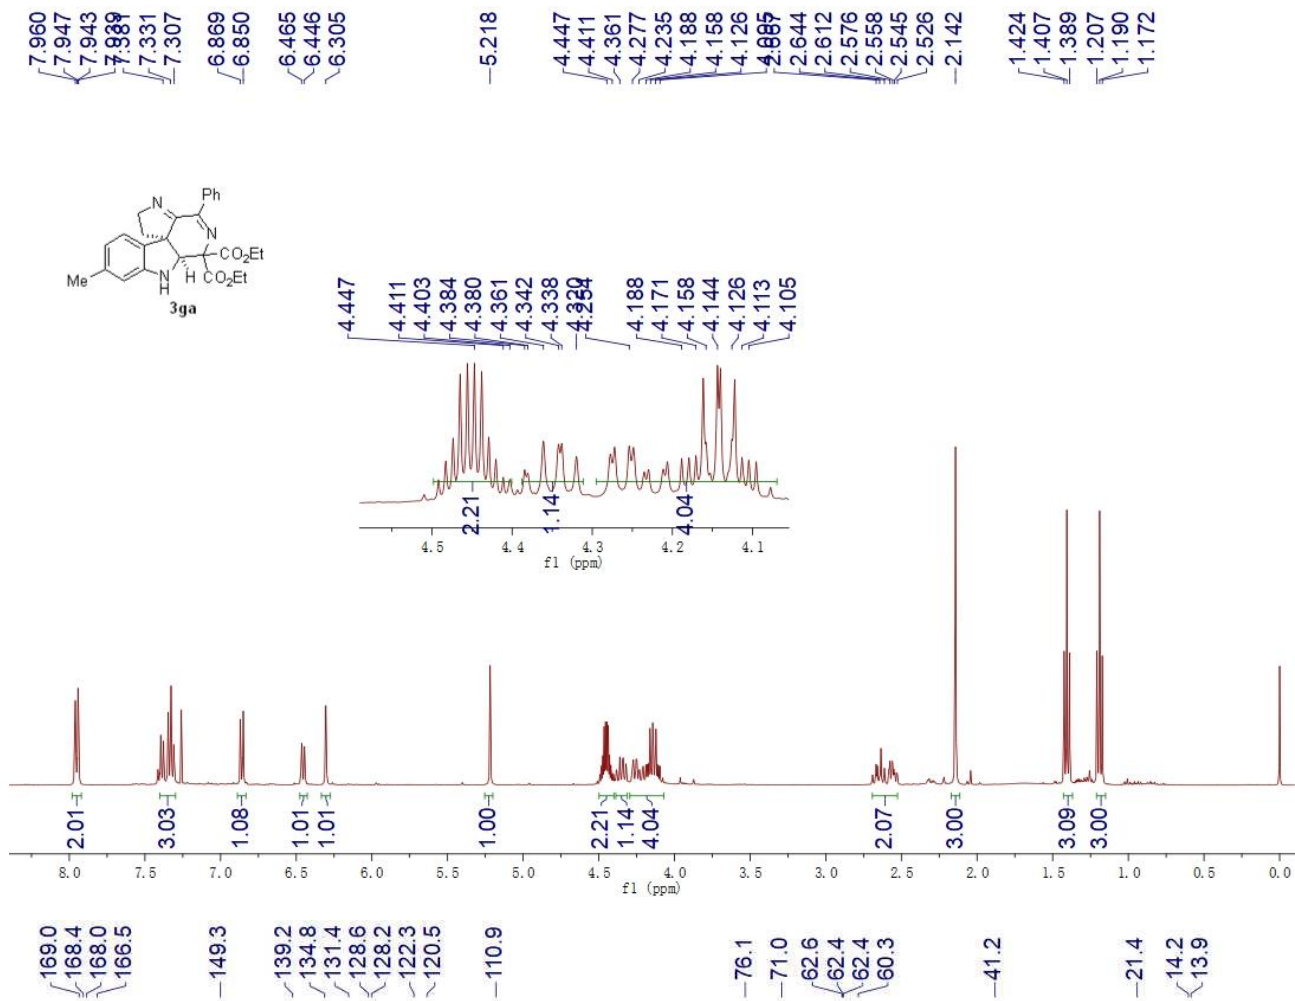

7.923  
7.920  
7.916  
7.907  
7.902  
7.899  
7.342  
7.306  
6.861  
6.842  
6.807  
6.788  
6.624  
6.605  
6.587  
5.245  
5.233  
4.464  
4.331  
4.331  
4.260  
4.235  
4.197  
4.170  
4.145  
4.118  
2.652  
2.620  
2.602  
2.584  
2.571  
2.552  
-2.003  
1.421  
1.403  
1.217  
1.199  
1.181

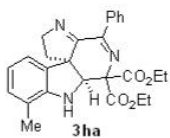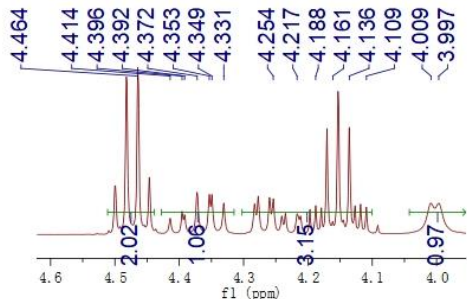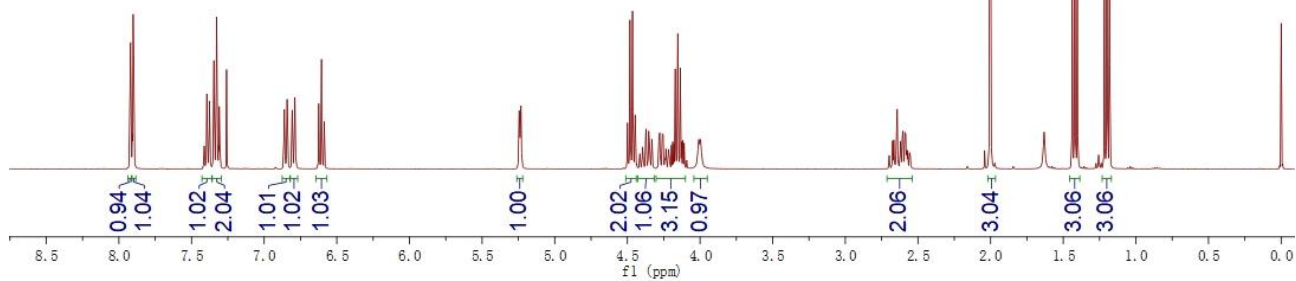

169.1  
168.5  
168.0  
166.5  
147.9  
134.9  
131.4  
130.4  
129.9  
128.7  
128.2  
120.0  
119.6  
76.3  
70.7  
62.9  
62.6  
62.4  
60.3  
41.5  
16.7  
14.3  
13.9

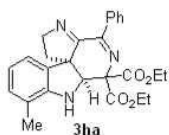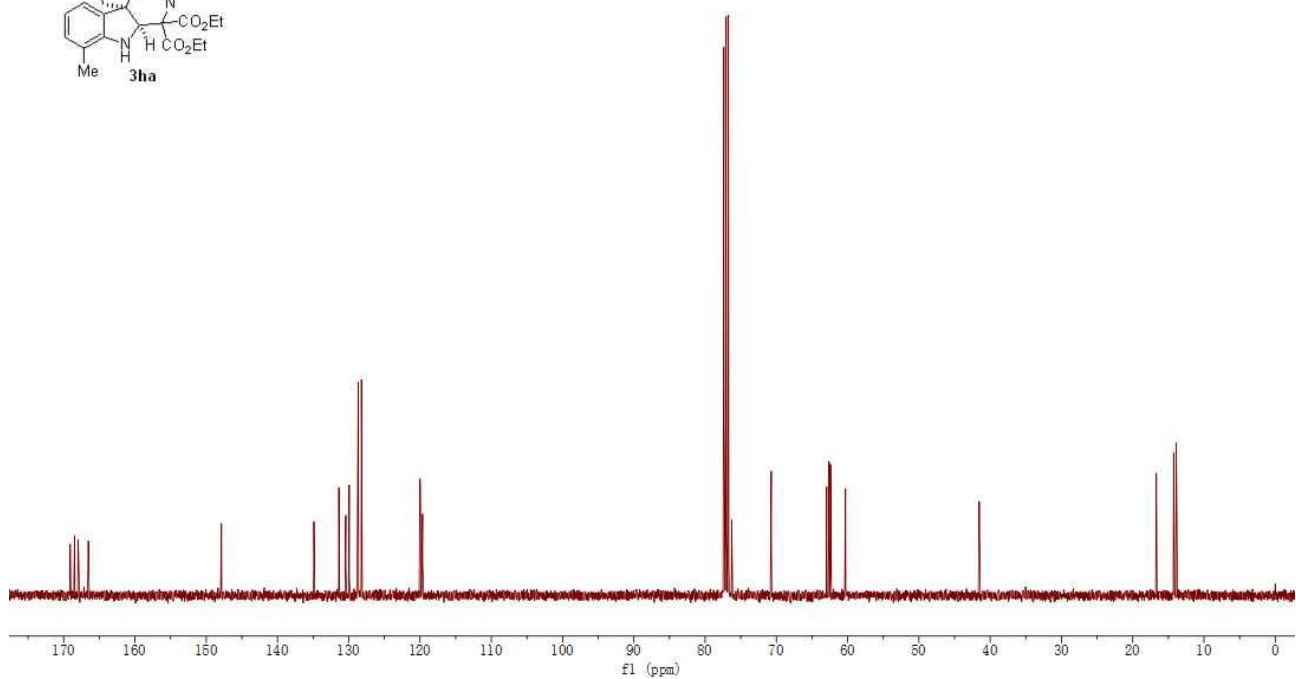

-7.641  
 -7.321  
 -7.207  
 -6.987  
 -6.968  
 -6.936  
 -6.918  
 -6.894  
 -6.876  
 -5.277  
 -5.090  
 -4.280  
 -4.079  
 -4.054  
 -4.009  
 -3.904  
 -3.877  
 -3.842  
 -3.698  
 -3.665  
 -3.570  
 -3.515  
 -2.429  
 -2.175  
 -1.967  
 1.281  
 1.263  
 1.245  
 1.123  
 1.105  
 1.088

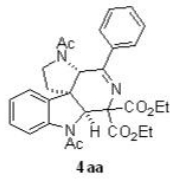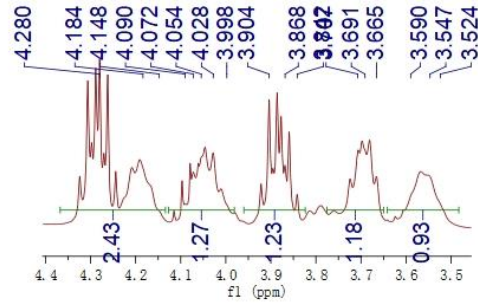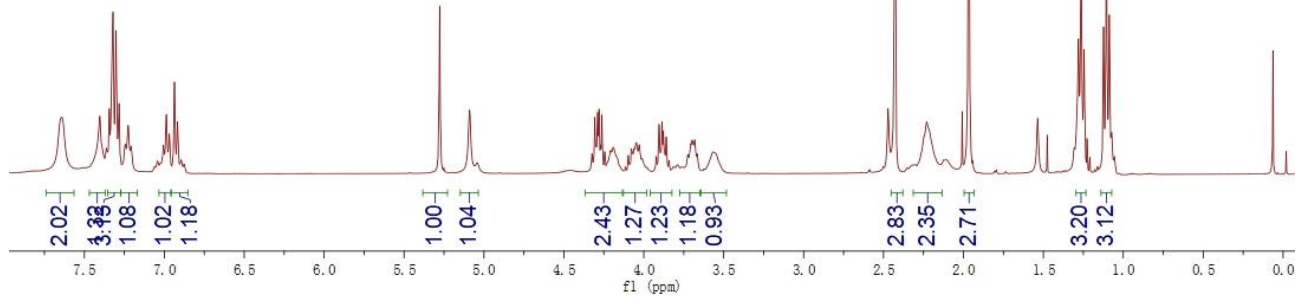

170.2  
 169.9  
 169.6  
 168.6  
 -143.0  
 130.3  
 129.8  
 129.1  
 128.9  
 128.6  
 127.9  
 127.8  
 127.5  
 124.8  
 121.9  
 65.0  
 63.0  
 62.8  
 62.6  
 62.2  
 -46.1  
 -39.9  
 23.9  
 21.8  
 13.9  
 13.8

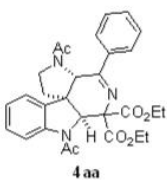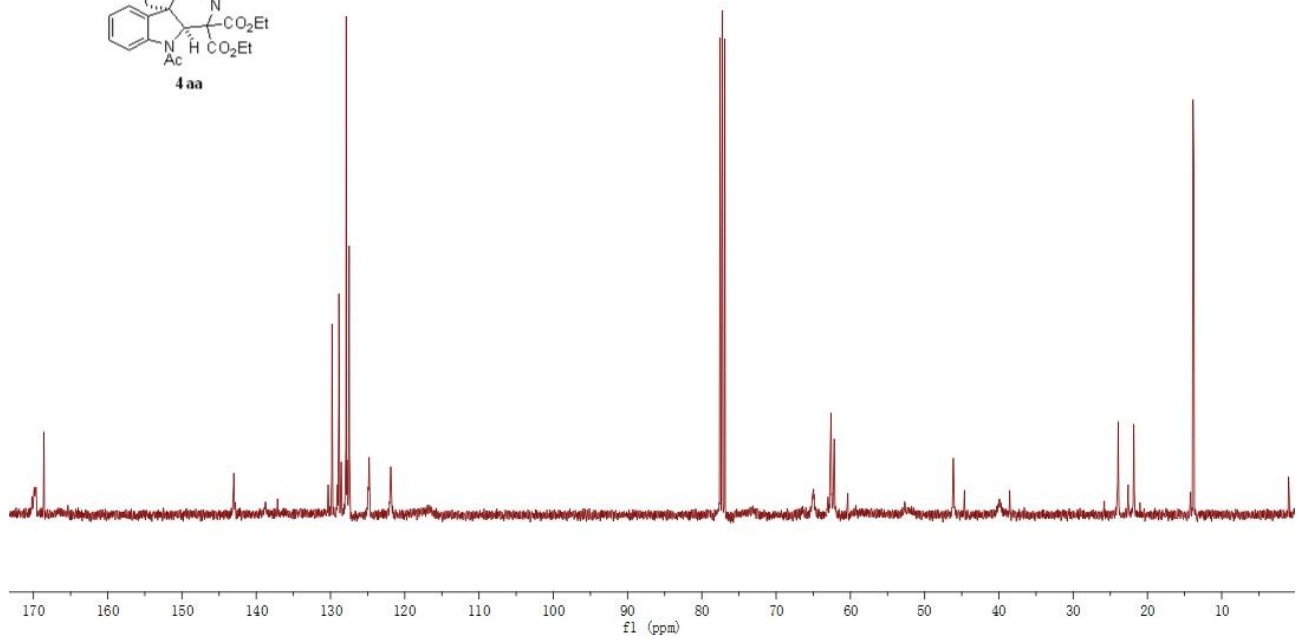

Supplement: d1cc04576h1.pdf [file d1cc04576h1.pdf]
